# Supplementary material for: Parameterizations of US wildfire and prescribed fire emission ratios and emission factors based on FIREX-AQ aircraft measurements
Source: Copernicus journal article supplement (doi:10.5194/egusphere-2023-1439), 2023-07-05
Supplement: Supplementary file 1 [file egusphere-2023-1439-supplement-version2.zip]

Archive with 2 entries (2 files):
- 2023_FIREXAQ_ACP_Supplement.pdf
- Table S1 FIREX-AQ Emissions.xlsx
