# Supplementary material for: Parameterizations of US wildfire and prescribed fire emission ratios and emission factors based on FIREX-AQ aircraft measurements
Source: Copernicus journal article supplement (doi:10.5194/egusphere-2023-1439), 2023-07-05
Supplement: Supplementary file 1 [file egusphere-2023-1439-supplement-version2.zip › Table S1 FIREX-AQ Emissions.xlsx]

## Sheet: S1 Mass Identification
Identified masses during the FIREX-AQ to describe wildfire emissions
Notes: For further measurement and instrument details we refer readers to https://www-air.larc.nasa.gov/missions/firex-aq/index.html
Highlighted are the masses where the PTR-ToF-MS detects multiple isomers
Exact Mass (da)	Chemical formula	NMOG contributor check Table S5, column G for isomers distribution	Detector used in this study	Uncertainty (%)	Comments
27.01	HCN	HCN	CIT-CIMS	15	calibrated
30.01	CH2O	Formaldehyde	CAMS, ISAF	10	ISAF adjusted to the CAMS values
32.03	CH4O	Methanol	NOAA PTR-ToF-MS	15	calibrated
41.03	C2H3N	Acetonitrile	NOAA PTR-ToF-MS	15	calibrated
43.01	HNCO	Isocyanic acid	NOAA PTR-ToF-MS	15	calibrated
44.03	C2H4O	Acetaldehyde	NOAA PTR-ToF-MS	15	calibrated
46.04	C2H6O	Ethanol	NOAA PTR-ToF-MS	15	calibrated
46	HCOOH	Formic acid	NOAA PTR-ToF-MS	15	calibrated
53.03	C3H3N	Acrylonitrile	NOAA PTR-ToF-MS	15	calibrated
56.03	C3H4O	Acrolein	NOAA PTR-ToF-MS	15	calibrated
58.04	C3H6O	Acetone	NOAA PTR-ToF-MS	15	calibrated
		Propanal	NOAA PTR-ToF-MS	15	similar sensitivity with acetone
60.02	C2H4O2	Acetic acid	NOAA PTR-ToF-MS for the sum	15	calibrated
		Glycolaldehyde		50	sensitivity calculation following Sekimoto et al 2017
61.02	CH3NO2	Nitromethane	NOAA PTR-ToF-MS	15	calibrated
62.02	C2H6S	Dimethyl sulfide	NOAA PTR-ToF-MS	50	calculation Sekimoto et al 2017
		Other unidentified organic compounds		100
67.04	C4H5N	Pyrrole	TOGA	100	estimated
		Butene nitrile isomers	TOGA	22	uncalibrated
68.03	C4H4O	Furan	TOGA	22	calibrated
72.06	C4H8O	MEK	NOAA PTR-ToF-MS	15	calibrated
		Butanal	TOGA	30	calibrated
		2-methylpropanal	TOGA	30	relative calibration based on butanal
74.04	C3H6O2	Methyl acetate	NOAA PTR-ToF-MS for the sum	50	sensitivity calculation following Sekimoto et al 2017
		Ethyl formate		50
		Hydroxyacetone		50
78.05	C6H6	Benzene	NOAA PTR-ToF-MS	15	calibrated
82.04	C5H6O	2-Methylfuran	TOGA	20	relative calibration based on 3-Methylfuran
		3-Methylfuran	TOGA	20	calibrated
84.02	C4H4O2	2(3H)-Furanone	NOAA PTR-ToF-MS	50	sensitivity calculation following Sekimoto et al 2017
86.04	C4H6O2	2,3-Butanedione + 2-Oxobutanal + 1,4-Butanedial	NOAA PTR-ToF-MS	50	sensitivity calculation following Sekimoto et al 2017
92.06	C7H8	Toluene	NOAA PTR-ToF-MS	15	calibrated
94.04	C6H6O	Phenol	CIT-CIMS	15	calibrated
96.02	C5H4O2	2-Furfural	TOGA	40	Estimated
		3-Furfural	TOGA	40	Estimated
96.05	C6H8O	2,5-Dimethylfuran	NOAA PTR-ToF-MS for the sum	50	sensitivity calculation following Sekimoto et al 2017
		2-Ethylfuran		50
		Other unidentified organic compounds		100
103.04	C7H5N	Benzonitrile	NOAA PTR-ToF-MS	50	sensitivity calculation following Sekimoto et al 2017
104.15	C8H8	Styrene	NOAA PTR-ToF-MS	15	calibrated
106.12	C7H6O	Benzaldehyde	NOAA PTR-ToF-MS	50	sensitivity calculation following Sekimoto et al 2017
106.167	C8H10	Ethylbenzene	NOAA PTR-ToF-MS for the sum	15	calibrated
		m- and p-Xylenes		15	calibrated
		o-Xylene		15	calibrated
108.14	C7H8O	2-Methylphenol (=o-cresol)	NOAA PTR-ToF-MS	15	calibrated
		Anisol	NOAA PTR-ToF-MS	15	calibrated
118.1	C8H6O	Benzofuran	NOAA PTR-ToF-MS	50	sensitivity calculation following Sekimoto et al 2017
120.19	C9H12	C9 Aromatics	NOAA PTR-ToF-MS	15	calibrated
124.09	C6H4O3	Hydroxy benzoquinone	NOAA PTR-ToF-MS	50	sensitivity calculation following Sekimoto et al 2017
124.14	C7H8O2	Guaiacol (=2-methoxyphenol)	NOAA PTR-ToF-MS	15	calibrated
128.17	C10H8	Naphthalene	NOAA PTR-ToF-MS	50	calculation Sekimoto et al 2017
136.24	C10H16	Monoterpenes	NOAA PTR-ToF-MS	15	calibrated
138.16	C8H10O2	2-Methoxy-4-methylphenol (= creosol)	NOAA PTR-ToF-MS	15	calibrated
154.17	C8H10O3	syringol	NOAA PTR-ToF-MS	50	sensitivity calculation following Sekimoto et al 2017
110.11	C6H6O2	5-Methylfurfural	NOAA PTR-ToF-MS for the sum	15	calibrated
		Benzene diols (=catechol, resorcinol)		15
70.09	C4H6O	MVK	NOAA PTR-ToF-MS for the sum	15	calibrated
		Methacrolein		15	calibrated
		2-Butenal (=crotonaldehyde)		15	calibrated
58.04	CHOCHO	Glyoxal	ACES	4	calibrated
72.06	CH3COCHO	Methyl glyoxal	ACES	4	calibrated
46.02	HCOOH	Formic acid	NOAA CIMS	15	calibrated
47.01	HONO	Nitrous acid	NOAA CIMS	15	calibrated
108.01	N2O5	Dinitrogen pentoxide	NOAA CIMS	15	calibrated
30.01	NO	Nitric oxide	CL	signal dependent error*	calibrated
46.005	NO2	Nitrogen dioxide	CL	signal dependent error*	calibrated
	NOy	NOy	CL	signal dependent error*	calibrated
17.031	NH3	Ammonia	Oslo PTR-ToF-MS	signal dependent error*	calibrated
62.005	pNO3-	Particulate nitrate	AMS	34	calibrated
18.039	pNH4+	Particulate ammonium	AMS	34	calibrated
27.99	CO	Carbon monoxide	DACOM	2	calibrated
16.03	CH4	Methane	DACOM	1	calibrated
43.99	CO2	Carbon dioxide	DACOM	2	calibrated
	BC	Black carbon	SP2	20-40	calibrated
	OA	Organic aerosol	AMS	38	calibrated
30.0469	C2H6	Ethane	iWAS	signal dependent error*	calibrated
44.0626	C3H8	Propane	iWAS	6	calibrated
58.0782	C4H10	i-Butane	iWAS	signal dependent error*	calibrated
58.0782	C4H10	n-Butane	iWAS	signal dependent error*	calibrated
72.0939	C5H12	i-Pentane	iWAS	signal dependent error*	calibrated
72.0939	C5H12	n-Pentane	iWAS	signal dependent error*	calibrated
86.1095	C6H14	n-Hexane	iWAS	signal dependent error*	calibrated
86.1095	C6H14	2-Methylpentane	iWAS	signal dependent error*	calibrated
100.125	C7H16	2,4-Dimethylpentane	iWAS	signal dependent error*	calibrated
128.156	C9H20	n-Nonane	iWAS	signal dependent error*	calibrated
142.172	C10H22	n-Decane	iWAS	signal dependent error*	calibrated
28.0313	C2H4	Ethene	iWAS	signal dependent error*	calibrated
42.047	C3H6	Propene	iWAS	6	calibrated
56.0626	C4H8	trans-2-Butene	iWAS	signal dependent error*	calibrated
56.0626	C4H8	1-Butene	iWAS	signal dependent error*	calibrated
56.0626	C4H8	i-Butene	iWAS	signal dependent error*	calibrated
56.0626	C4H8	cis-2-Butene	iWAS	signal dependent error*	calibrated
70.0782	C5H10	2-Methyl-1-Butene	iWAS	signal dependent error*	calibrated
70.0782	C5H10	trans-2-Pentene	iWAS	signal dependent error*	calibrated
70.0782	C5H10	1-Pentene	iWAS	signal dependent error*	calibrated
70.0782	C5H10	cis-2-Butene	iWAS	signal dependent error*	calibrated
84.0939	C6H12	Methylcyclopentane	iWAS	signal dependent error*	calibrated
98.1095	C7H14	Methylcyclohexane	iWAS	signal dependent error*	calibrated
26.0157	C2H2	Ethyne	iWAS	7	calibrated (higher uncertainty due to limited calibrations)
68.0626	C5H8	Pentadiene	iWAS	signal dependent error*	calibrated
68.0626	C5H8	Isoprene	iWAS	signal dependent error*	calibrated
112.008	C6H5Cl	Chlorobenzene	WAS	signal dependent error*	calibrated
77.0113	CH3NO3	Methyl nitrate	WAS	signal dependent error*	calibrated
91.0269	C2H5NO3	Ethyl nitrate	WAS	signal dependent error*	calibrated
105.043	C3H7NO3	i-Propyl nitrate	WAS	signal dependent error*	calibrated
105.043	C3H7NO3	n-Propyl nitrate	WAS	signal dependent error*	calibrated
119.058	C4H9NO3	2-Butyl nitrate	WAS	signal dependent error*	calibrated
60.0211	C2H4O2	Methyl formate	WAS	12	calibrated
60.0575	C3H8O	i-Propanol	WAS	18	calibrated
117.914	CHCl3	Trichloromethane	WAS	5	calibrated
84.0939	C6H12	1-Hexene	WAS	signal dependent error*	calibrated
98.1095	C7H14	1-Heptene	WAS	signal dependent error*	calibrated
112.125	C8H16	1-Octene	WAS	signal dependent error*	calibrated
126.141	C9H18	1-Nonene	WAS	signal dependent error*	calibrated
40.0313	C3H4	Propyne	WAS	signal dependent error*	calibrated
54.047	C4H6	1-Butyne	WAS	signal dependent error*	calibrated
54.047	C4H6	2-Butyne	WAS	signal dependent error*	calibrated
52.0313	C4H4	1-Buten-3-yne	WAS	signal dependent error*	calibrated
50.0157	C4H2	1,3-Butadiyne	WAS	signal dependent error*	calibrated
120.094	C9H12	i-Propylbenzene	WAS	signal dependent error*	calibrated
120.094	C9H12	n-Propylbenzene	WAS	signal dependent error*	calibrated
120.094	C9H12	2-Ethyltoluene	WAS	signal dependent error*	calibrated
120.094	C9H12	3-Ethyltoluene	WAS	signal dependent error*	calibrated
120.094	C9H12	4-Ethyltoluene	WAS	signal dependent error*	calibrated
120.094	C9H12	1,2,4-TMB	WAS	signal dependent error*	calibrated
120.094	C9H12	1,3,5-TMB	WAS	signal dependent error*	calibrated
* Errors are calculated as a timeseries and provided at the FIREX-AQ data repository: https://www-air.larc.nasa.gov/missions/firex-aq/index.html

## Sheet: S2 Emission Ratios
FIREX-AQ Emission Ratios to CO by Fire (ppbv NMOG/ppmv CO)
		Fire		FIREX-AQ Average ERs		Shady		Shady		North Hills		Tucker		Ridgetop		Lick Creek		Williams Flats		Williams Flats		Horsefly		Horsefly		Williams Flats		Castle		Castle		Castle		Sheridan		Blackwater
		Transect number				0		9		0		0		4		1		0		21		1		3		7		0		0		10		1		8
		Time				2019-07-25 22:48:52		2019-07-25 23:47:07		2019-07-29 23:21:21		2019-07-30 02:40:50		2019-08-02 23:18:16		2019-08-03 01:13:13		2019-08-03 22:22:37		2019-08-04 00:41:49		2019-08-06 23:20:14		2019-08-06 23:28:36		2019-08-09 01:49:29		2019-08-13 00:18:44		2019-08-13 23:17:23		2019-08-14 01:32:40		2019-08-17 00:42:03		2019-08-30 17:11:08
		Maleic anhydride to furan (chemical age)		0.136793		0.0885127		0.0698897		0.131313		0.124402		0.142458		0.147153		0.162543		0.135974		0.118823		0.110727		0.110727		0.148048		0.163408		0.0734033		0.150601		0.310707
		Physical age (s)		2859.59		1354		1235		600		1723		2619		1492		887.5		6127		3885		6252.5		5455.5		1539		9196		1597		1216		575
		MCE		0.899507		0.90707		0.89891		0.8616		0.91542		0.93613		0.9108		0.90941		0.90752		0.87231		0.84802		0.9103		0.89261		0.89886		0.88463		0.90724		0.93128
Exact Mass (da)	Chemical formula	NMOG contributor check Table S5, column G for isomers distribution	Instrument	Average ER	Standard deviation	Average ER	Standard deviation	Average ER	Standard deviation	Average ER	Standard deviation	Average ER	Standard deviation	Average ER	Standard deviation	Average ER	Standard deviation	Average ER	Standard deviation	Average ER	Standard deviation	Average ER	Standard deviation	Average ER	Standard deviation	Average ER	Standard deviation	Average ER	Standard deviation	Average ER	Standard deviation	Average ER	Standard deviation	Average ER	Standard deviation	Average ER	Standard deviation
27.0102	HCN	HCN	CIT-CIMS	3.00955	1.03048	1.78013	0.0354899	1.79006	0.0523236	3.7209	0.255522	4.79704	0.129518	3.23535	0.0469382	1.722	0.0722884	4.83396	0.114731	5.08479	0.0497954	2.61937	0.0234513	2.61053	0.0181317	3.11025	0.189039	2.55117	0.0457168	2.50027	0.0286284	2.30499	0.0593433	2.93836	0.0720169	2.55363	0.178771
30.0098	CH2O	Formaldehyde	CAMS & ISAF	17.9242	4.42621	20.5173	0.271704	19.8757	0.573173	10.7124	0.302215	17.0831	0.409604	19.9572	0.510223	15.1358	0.801974	14.8926	0.411629	16.2277	0.0838012	23.4068	0.380763	26.1035	0.424596	11.3528	0.298912	18.3287	0.310428	20.312	0.205011	15.3421	0.411928	14.4644	0.33234	23.0745	0.872488
32.0255	CH4O	Methanol	NOAA PTR-ToF-MS	10.8989	3.14297	7.53966	0.600578	10.2297	1.2208	11.0832	0.462629	8.92706	0.653294	7.10046	0.375901	8.79039	0.767784	8.04068	1.57366	7.66826	0.0779238	14.5918	0.315642	15.6581	0.289455	13.0656	0.40996	14.7125	0.421139	13.72	0.416574	15.7558	0.831713	10.2906	0.605974	7.20899	0.604395
41.0258	C2H3N	Acetonitrile	NOAA PTR-ToF-MS	2.03871	0.818467	1.30341	0.109587	1.47317	0.217701	2.61868	0.303115	3.47741	0.255965	1.85658	0.102733	1.05626	0.0753972	3.18611	0.277255	2.97402	0.0263138	1.06947	0.0192388	1.04691	0.0196196	2.36238	0.0867651	2.0944	0.0678182	1.99698	0.0617323	2.21792	0.123251	3.05809	0.199771	0.82751	0.0635177
43.0051	HNCO	Isocyanic acid	NOAA PTR-ToF-MS	3.5084	2.53246	2.92274	0.239792	2.85811	6.67669	0	0	8.86179	0.625783	6.0288	0.337136	0	0	4.98077	2.67947	4.85372	0.0609162	1.73897	0.0601696	2.51167	0.0690974	3.16192	5.77772	2.3476	2.52497	2.78595	0.0904604	1.70405	0.134647	3.79623	0.216286	7.58215	0.461463
44.0255	C2H4O	Acetaldehyde	NOAA PTR-ToF-MS	11.2483	1.6912	11.0354	0.855954	13.9619	5.1761	9.04791	1.07112	12.5043	0.859494	10.1867	0.507723	9.2398	0.660819	11.5726	4.7971	10.8378	0.0955575	12.7596	0.272547	14.2913	0.269132	9.3333	0.21731	12.1413	0.300553	12.5047	0.366083	11.3763	0.601555	8.92752	0.499393	10.2517	0.738231
46.0411	C2H6O	Ethanol	NOAA PTR-ToF-MS	0.0981844	0.258769	0	0	0	0	0	0	0	0	0	0	0	0	0	0	0	0	0	0	0.641422	2.3992	0.929529	5.98662	0	0	0	0	0	0	0	0	0	0
46.0048	HCOOH	Formic acid	NOAA PTR-ToF-MS	3.31249	2.02852	3.05975	0.221414	3.83737	2.15723	0	0	0	0	4.83183	0.248415	0	0	4.00463	1.01431	2.57407	0.0471647	3.98098	0.100601	6.52259	0.149249	4.7909	0.890333	5.18872	0.202924	4.71031	0.16879	3.35199	0.167873	2.14226	0.117792	4.00446	0.308876
53.0258	C3H3N	Acrylonitrile	NOAA PTR-ToF-MS	0.201903	0.0723671	0.163409	0.0126642	0.191813	0.146895	0.114876	1.37199	0.374114	0.0295326	0.237237	0.0138138	0.108374	0.00834542	0.288264	1.18522	0.291188	0.00352772	0.141778	0.0041603	0.158123	0.0031507	0.222221	0.0134241	0.143078	0.00704341	0.170321	0.00621983	0.148824	0.00927762	0.249124	0.0153447	0.227701	0.0166116
56.0255	C3H4O	Acrolein	NOAA PTR-ToF-MS	3.73106	2.60934	3.3006	0.248408	4.38922	5.07333	1.98313	0.314122	2.80733	0.184803	2.5219	0.130561	2.60638	0.174616	2.45313	1.04432	2.50303	0.0217223	9.72168	0.230472	11.3347	0.217501	2.29568	0.0511387	2.77978	0.0739056	3.0915	0.0854306	2.57372	0.13471	2.10112	0.110332	3.23408	0.229162
58.0411	C3H6O	Acetone + Propanal	NOAA PTR-ToF-MS for the sum	4.03549	0.866427	3.37572	0.269324	4.37111	0.268499	5.42626	0.14534	3.65464	0.27721	3.54826	0.188801	2.90128	0.289506	4.10875	0.35574	3.80064	0.0341926	3.50544	0.0725845	4.33432	0.0908943	5.16483	0.107358	5.03903	0.134251	4.72734	0.143597	4.76879	0.243927	3.28773	0.199405	2.5537	0.207435
60.0204	C2H4O2	Acetic acid + Glycolaldehyde	NOAA PTR-ToF-MS for the sum	8.86298	1.50545	7.58834	0.576869	9.89149	691.19	7.62732	0.53816	11.135	0.719039	7.05755	0.348133	6.02511	0.401304	9.54363	1.58785	8.39472	0.0703748	8.93324	0.204154	10.3374	0.177675	8.00764	0.208445	9.06458	0.258788	11.575	0.33503	10.0427	0.521361	8.81092	0.468479	7.77306	0.575704
61.0157	CH3NO2	Nitromethane	NOAA PTR-ToF-MS	0.227822	0.123167	0.203836	0.017296	0.243984	0.598732	0	0	0.235544	0.0170429	0.300429	0.0159928	0.193517	0.0164777	0.223578	6.54092	0.240262	0.00294813	0.244928	0.00771668	0.348111	0.0124154	0.208912	0.0116584	0.13803	0.00852473	0.21173	0.00719213	0.129453	0.00864035	0.16929	0.0105372	0.553541	0.0399568
62.0183	C2H6S	Dimethyl sulfide + Other unidentified organic compounds	NOAA PTR-ToF-MS	0.00884182	0.00688372	0.00910119	0.325977	0.00854354	0.109928	0	0	0	0	0.0121153	0.166814	0	0	0.0163516	0.209479	0.0135558	0.000420825	0.00954704	0.0452101	0.00836361	0.0418442	0.0118373	0.0779797	0	0	0.0182978	0.283203	0.0146724	0.0461024	0	0	0.0190836	0.00219576
67.0415	C4H5N	Pyrrole	TOGA	0.0465625	0.0225	0.0375	0	0.0425	0.0025	0.0225	0.0025	0.1025	0.0075	0.045	0.0025	0.02	0.0025	0.05	0.005	0.0825	0	0.02	0	0.0375	0.00338304	0.025	0	0.0375	0.0025	0.0475	0.0025	0.0425	0	0.085	0.0075	0.0475	0.0025
67.0415	C4H5N	Butene nitrile isomers	TOGA	0.0279375	0.0135	0.0225	0	0.0255	0.0015	0.0135	0.0015	0.0615	0.0045	0.027	0.0015	0.012	0.0015	0.03	0.003	0.0495	0	0.012	0	0.0225	0.00202982	0.015	0	0.0225	0.0015	0.0285	0.0015	0.0255	0	0.051	0.0045	0.0285	0.0015
68.0255	C4H4O	Furan	TOGA	1.3271	0.4048	1.4628	0.046	1.6284	0.092	0.8602	0.1748	1.1546	0.069	0.8556	0.0368	1.127	0.069	0.9982	0.0828	1.5134	0.0138	1.8998	0.0276	0.9522	0.0537333	2.1574	0.023	0.9292	0.0184	1.5456	0.046	1.541	0.0276	1.6422	0.1104	0.966	0.0552
72.0568	C4H8O	MEK	NOAA PTR-ToF-MS	0.836723	0.187419	0.672196	0.0525109	0.876776	0.600141	0.817391	0.122188	0.823087	0.064207	0.677758	0.0375261	0.628395	0.0463699	0.942015	0.291703	0.860399	0.00861534	0.771368	0.0185618	0.851191	0.0157048	0.923216	0.0226876	1.13736	0.0349394	1.11547	0.035759	1.13954	0.0537045	0.742583	0.0482952	0.408818	0.0312624
72.0568	C4H8O	Butanal	TOGA	0.216775	0.0624	0.195	0.0026	0.2184	0.0104	0.1586	0.0312	0.2132	0.0182	0.1768	0.0078	0.1612	0.013	0.1924	0.0182	0.2236	0.0026	0.2002	0.0052	0.1066	0.0078606	0.2132	0.0026	0.2418	0.0052	0.3172	0.013	0.2938	0.0052	0.3666	0.0312	0.1898	0.013
72.0568	C4H8O	2-Methylpropanal	TOGA	0.16675	0.048	0.15	0.002	0.168	0.008	0.122	0.024	0.164	0.014	0.136	0.006	0.124	0.01	0.148	0.014	0.172	0.002	0.154	0.004	0.082	0.00604662	0.164	0.002	0.186	0.004	0.244	0.01	0.226	0.004	0.282	0.024	0.146	0.01
74.0361	C3H6O2	Methyl acetate + Ethyl formate + Hydroxyacetone	NOAA PTR-ToF-MS for the sum	2.69735	0.71461	2.48558	0.19101	3.36365	2.75667	2.29088	0.252108	2.2969	0.16526	1.87205	0.0893449	2.08406	0.148933	2.00035	0.56607	1.97816	0.0175239	3.65776	0.0958184	3.83134	0.0696918	2.30845	0.0459627	3.8052	0.0994454	3.35006	0.0904976	3.40625	0.16872	2.03903	0.107713	2.38789	0.17641
78.0462	C6H6	Benzene	NOAA PTR-ToF-MS	2.26414	0.237575	2.23049	0.171576	2.78823	5.22695	2.12357	0.722351	2.35662	0.160794	1.94889	0.0955972	2.19778	0.160501	2.33613	0.562388	2.26421	0.0181138	2.36413	0.0514764	2.39827	0.0411164	2.18581	0.0447996	2.367	0.0674367	2.24719	0.0669576	2.23463	0.124713	1.68333	0.099381	2.49997	0.184282
82.0411	C5H6O	2-Methylfuran	TOGA	0.3446	0.1024	0.3888	0.0096	0.4528	0.0224	0.2512	0.0464	0.3216	0.0208	0.2432	0.0096	0.304	0.0192	0.2544	0.0224	0.3552	0.0032	0.4464	0.0112	0.1904	0.012438	0.5056	0.0064	0.2768	0.0064	0.4128	0.0144	0.3824	0.0064	0.5152	0.04	0.2128	0.0128
82.0411	C5H6O	3-Methylfuran	TOGA	0.0581512	0.01728	0.06561	0.00162	0.07641	0.00378	0.04239	0.00783	0.05427	0.00351	0.04104	0.00162	0.0513	0.00324	0.04293	0.00378	0.05994	0.00054	0.07533	0.00189	0.03213	0.00209892	0.08532	0.00108	0.04671	0.00108	0.06966	0.00243	0.06453	0.00108	0.08694	0.00675	0.03591	0.00216
84.0204	C4H4O2	2(3H)-Furanone	NOAA PTR-ToF-MS	1.59729	0.481542	1.72784	0.107746	1.72144	0.176928	1.28678	0.7456	1.34854	0.0773921	1.1566	0.0463764	1.13938	0.0604975	1.22263	0.0943375	1.91012	0.0356801	2.15646	0.0437006	2.76766	0.0790244	0.919391	0.0254297	1.63803	0.0696516	2.02455	0.0633808	1.54089	0.0859877	0.997769	0.0425056	1.99862	0.12899
86.0361	C4H6O2	2,3-Butanedione + 2-Oxobutanal + 1,4-Butanedial	NOAA PTR-ToF-MS for the sum	1.42686	0.374512	1.44049	0.097571	1.95558	2.12236	1.21304	0.272334	1.43599	0.0881799	0.904673	0.0401865	1.16888	0.0775857	1.16534	0.758822	1.27117	0.0110251	1.81724	0.0417241	1.94823	0.0369998	0.864883	0.0158359	1.76012	0.0523197	1.79233	0.0442767	1.8243	0.079391	1.02361	0.049274	1.24388	0.0846111
92.0619	C7H8	Toluene	NOAA PTR-ToF-MS	1.42422	0.343547	1.30776	0.0997063	1.77022	1.12633	1.78108	0.474038	1.13158	0.077522	1.23278	0.0601447	0.923852	0.0613345	1.58719	0.899767	1.59999	0.0135069	1.6632	0.0416736	1.69046	0.0297515	1.35851	0.0394786	1.86779	0.0455025	1.58203	0.0455296	1.65376	0.0880956	0.89956	0.0530683	0.737725	0.0555112
94.0411	C6H6O	Phenol	CIT-CIMS	0.427357	0.131181	0.291408	0.00584692	0.376068	0.00761857	0.236653	0.0210548	0.452225	0.0167665	0.361959	0.0103312	0.575949	0.0160028	0.498024	0.0119028	0.607325	0.00401078	0.347542	0.00354558	0.314617	0.0278577	0.417014	0.00448544	0.338663	0.00435912	0.564644	0.012832	0.60604	0.00758481	0.59192	0.0180735	0.257667	0.00646179
96.0204	C5H4O2	2-Furfural	TOGA	0.473963	0.1144	0.4818	0.011	0.5368	0.0286	0.3146	0.0572	0.4224	0.0264	0.319	0.0132	0.3608	0.0242	0.3498	0.0308	0.495	0.0044	0.5764	0.0088	0.528	0.0343643	0.6226	0.0066	0.3982	0.0088	0.6028	0.0198	0.5676	0.0088	0.6138	0.0418	0.3938	0.022
96.0204	C5H4O2	3-Furfural	TOGA	0.0473962	0.01144	0.04818	0.0011	0.05368	0.00286	0.03146	0.00572	0.04224	0.00264	0.0319	0.00132	0.03608	0.00242	0.03498	0.00308	0.0495	0.00044	0.05764	0.00088	0.0528	0.00343643	0.06226	0.00066	0.03982	0.00088	0.06028	0.00198	0.05676	0.00088	0.06138	0.00418	0.03938	0.0022
96.0568	C6H8O	2,5-Dimethylfuran + 2-Ethylfuran + Other unidentified organic compounds	NOAA PTR-ToF-MS for the sum	1.06696	0.264851	1.13118	0.0786112	1.53768	2.56022	1.0182	0.36659	1.10173	0.0649948	0.791691	0.0385343	0.857669	0.0529301	0.987962	0.902615	1.12771	0.011609	1.26194	0.0370824	1.33412	0.0219875	0.801677	0.0203852	1.20208	0.0347155	1.27796	0.0305726	1.40107	0.074541	0.676377	0.0343691	0.562345	0.0419112
103.04	C7H5N	Benzonitrile	NOAA PTR-ToF-MS	0.200202	0.0597885	0.167316	0.0118183	0.183331	0.105149	0.204153	0.172205	0.291441	0.0195591	0.140662	0.00853402	0.117179	0.00736458	0.308973	0.0933396	0.284585	0.00264972	0.166234	0.00394854	0.166808	0.003191	0.23793	0.00846252	0.210474	0.00814213	0.195617	0.00599639	0.207854	0.0119395	0.235264	0.0154252	0.0854074	0.00779069
104.15	C8H8	Styrene	NOAA PTR-ToF-MS	0.26011	0.0557667	0.282495	0.0191347	0.332249	0.0343061	0.296861	0.222057	0.260781	0.018496	0.25105	0.0122666	0.174378	0.0116906	0.216962	0.0170033	0.33364	0.00356348	0.304477	0.00781114	0.342733	0.00626425	0.214759	0.00680179	0.255482	0.0124281	0.231334	0.00663786	0.234163	0.0145691	0.13361	0.00772482	0.296787	0.025937
106.12	C7H6O	Benzaldehyde	NOAA PTR-ToF-MS	0.346374	0.0599355	0.385216	0.0214448	0.407145	0.0356927	0.358839	0.495644	0.328164	0.0158106	0.317886	0.0146917	0.288655	0.0149413	0.301669	0.0225151	0.410705	0.00328044	0.40292	0.00757829	0.442846	0.00701956	0.25582	0.0108703	0.368359	0.0139487	0.377567	0.0111722	0.353688	0.0144188	0.198292	0.0100011	0.344213	0.0223999
106.167	C8H10	Ethylbenzene + p-/m-/o-Xylenes	NOAA PTR-ToF-MS for the sum	0.468011	0.122961	0.454783	0.031826	0.639578	0.473554	0.540161	0.141444	0.37958	0.0212056	0.433359	0.0193484	0.280822	0.0230261	0.502876	0.424245	0.526457	0.0046227	0.434667	0.00990419	0.474477	0.00876413	0.422507	0.0115068	0.672701	0.0221886	0.606514	0.0184732	0.59611	0.0385488	0.288512	0.0161284	0.235071	0.0173312
108.14	C7H8O	2-Methylphenol (=o-cresol) + Anisol	NOAA PTR-ToF-MS for the sum	1.31516	0.360736	1.43359	0.0682767	1.46205	0.111999	0.963617	0.11288	1.21998	0.0531036	0.981834	0.0319618	1.17375	0.0508948	1.24393	0.063902	1.83175	0.0146565	1.42832	0.0294185	1.63692	0.020818	0.954911	0.0188108	1.71796	0.0358033	1.65358	0.0316568	1.83799	0.0549415	0.753532	0.0236883	0.748923	0.0489958
118.1	C8H6O	Benzofuran	NOAA PTR-ToF-MS	0.142694	0.0312794	0.155576	0.00894809	0.163892	0.014717	0.107582	0.457216	0.127714	0.00776989	0.108143	0.00601515	0.116188	0.00940571	0.120318	0.00861933	0.183816	0.00181461	0.161525	0.00448412	0.177239	0.00376115	0.124828	0.00500775	0.171291	1.66581	0.164067	0.00583964	0.184275	0.0130342	0.0850663	0.00571174	0.131581	0.00908334
120.19	C9H12	C9 Aromatics**	NOAA PTR-ToF-MS	0.17826	0.0807183	0.167579	0.0113427	0.20356	0.0208023	0	0	0.147834	0.012941	0.18402	0.00825654	0.107656	0.0118949	0.198713	0.188742	0.217442	0.00217726	0.184388	0.00339303	0.195191	0.00366481	0.185656	0.00527023	0.308845	0.0117317	0.24549	0.00730782	0.277921	0.0176913	0.11692	0.00843774	0.110943	0.00875549
124.09	C6H4O3	Hydroxy benzoquinone	NOAA PTR-ToF-MS	0.232262	0.0849163	0.172525	0.00863615	0.165929	0.0118447	0.236122	0.482095	0.177982	0.00759632	0.13096	0.00632106	0.220492	0.00922415	0.173428	0.0100903	0.242394	0.00189987	0.393105	0.00694873	0.384379	0.00715129	0.101091	0.00411622	0.28261	0.0144007	0.306924	0.00718714	0.272239	0.0139355	0.150613	0.00695228	0.305398	0.0154737
124.14	C7H8O2	Guaiacol (=2-Methoxyphenol)	NOAA PTR-ToF-MS	1.38385	0.517126	1.63182	0.0771201	1.74145	0.125238	1.34957	0.805091	1.04126	0.0407392	0.706317	0.0261894	1.10325	0.044595	1.08399	0.0710714	1.64668	0.0131802	1.5806	0.0300877	1.69523	0.0251695	0.916099	0.0347738	2.02964	0.051821	1.94936	0.0444535	2.35653	0.0657783	0.58675	0.0231684	0.723097	0.0326793
128.171	C10H8	Naphthalene	NOAA PTR-ToF-MS	0.160838	0.0793699	0.182788	0.0132214	0.242165	0.0179512	0	0	0.172493	0.0112895	0.153794	0.00972056	0.110722	0.194805	0.121169	0.00887137	0.142572	0.00205354	0.126914	0.00639936	0.157428	0.00473685	0.15105	0.00734135	0.191447	0.460451	0.178594	0.00901459	0.170062	0.0147573	0.111119	0.00899925	0.361097	0.0242675
136.24	C10H16	Monoterpenes	NOAA PTR-ToF-MS	0.817436	0.690459	0.634544	0.0494213	1.0699	0.406492	2.16707	0.480539	0.185663	0.0174626	0.665901	0.0451233	0	0	0.567857	0.359936	0.819564	0.010582	0.654484	0.0224464	0.654559	0.015401	0.794974	0.022846	1.70703	0.0572543	1.15689	0.0475304	1.88717	0.0940641	0.11336	0.0624067	0	0
138.16	C8H10O2	2-Methoxy-4-methylphenol (= Creosol)	NOAA PTR-ToF-MS	0.822185	0.351223	0.999792	0.0473684	1.07578	0.0790248	0.847601	0.401261	0.576853	0.02594	0.401666	0.0133089	0.693268	0.0309982	0.558743	0.0307834	0.893996	0.00746518	1.17071	0.0292661	1.216	0.0183859	0.421349	0.0177771	1.15351	0.0272177	1.10121	0.0245965	1.42053	0.0377884	0.307323	0.0124674	0.316617	0.0204954
154.17	C8H10O3	Syringol	NOAA PTR-ToF-MS	0.0779965	0.0563259	0.0650007	0.919252	0.0378908	0.00399642	0	0	0.160588	0.148609	0.0448126	0.0537269	0	0	0.0644947	0.107403	0.0840491	0.00165281	0.0630899	0.0038991	0.0743157	0.00352356	0.0357211	0.108122	0.137623	0.214132	0.101918	0.0060135	0.154717	0.458418	0.186093	0.512115	0.0376316	0.00454171
110.11	C6H6O2	5-Methylfurfural + Benzene diols (=Catechol, Resorcinol)	NOAA PTR-ToF-MS for the sum	2.72111	0.684665	3.21496	0.179157	3.33693	0.289131	2.81352	2.12035	2.24434	0.107046	1.73478	0.0756606	2.10553	0.102053	2.15061	0.151337	3.64987	0.0396171	3.41583	0.0753853	3.52686	0.0585981	1.7989	0.0412314	2.9551	0.0838589	3.03378	0.0696912	3.12268	0.137997	1.57325	0.0670124	2.86085	0.130895
70.0898	C4H6O	MVK + Methacrolein + 2-Butenal (=Crotonaldehyde)	NOAA PTR-ToF-MS for the sum	2.56282	0.565624	2.62429	0.181549	3.54009	2.23858	1.75248	0.164037	2.53831	0.159324	2.23286	0.106202	1.94499	0.132524	2.22154	1.90514	2.34883	0.0203531	3.26867	0.067136	3.64617	0.06444	2.08381	0.0482604	2.79752	0.0765712	2.84009	0.0754005	2.63809	0.11984	1.90405	0.0961603	2.62329	0.210093
58.04	CHOCHO	Glyoxal	ACES	0.938091	0.791171	1.37281	0.0462191	1.26008	0.0779655	0	0	1.03469	0.038761	0	0	0	0	0.968254	0.0428802	1.20993	0.00714817	1.96645	0.0292306	2.15958	0.0362568	0	0	0	0	1.19778	0.0342093	0.820695	0.0533583	0.796915	0.0618754	2.22227	0.141336
72.06266	CH3COCHO	Methyl glyoxal	ACES	1.55448	1.25933					0	0	2.87964	0.192832	0	0	0	0	1.85746	0.0992471	2.58832	0.0253923	2.66406	0.090822	2.29424	0.060999	0	0	0	0	2.53055	0.136989	2.2087	0.173752	2.1797	0.170694	2.5601	0.237131
47.0007	HONO	Nitrous acid	NOAA CIMS	1.88838	1.763	2.63997	0.131119	2.52091	0.150132	0.356484	0.0446648	4.59977	0.444211	3.24935	0.290785	1.26484	0.0411085	1.05197	0.833844	2.95787	0.0485989	0.903218	0.0353584	0.411089	0.776142	1.23287	0.0394536	0.346631	0.016095	0.52725	0.0161302	0.63758	0.0112182	1.79919	0.0905482	5.71513	0.198822
108.01	N2O5	Dinitrogen pentoxide	NOAA CIMS	0.000551406	0.000801695	0.000651351	6.09592e-05	0.00041683	3.38162e-05	0	0	0	0	0.00225903	0.000143561	0	0	0.00105323	0.00191117	0.000557683	1.07596e-05	0	0	0	0	0.00102276	0.00399567	0	0	0	0	0	0	0.000993076	5.85915e-05	0.00186854	0.000183551
30.01	NO	Nitric oxide	CL	1.42023	1.68407	2.01245	0.0941741	1.43248	0.122481	0.455571	0.0740951	1.30555	0.173437	5.53619	0.0761047	0.559574	0.0203238	1.42494	0.0674866	0.615125	0.0271639	0.0547307	0.0087843	0.022642	0.000868234	1.21381	0.125812	0.747187	0.0332495	0.958512	0.0232618	0.602008	0.0543749	1.95778	0.18149	3.82516	0.199406
46.0055	NO2	Nitrogen dioxide	CL	6.05073	5.24832	6.59314	0.143144	5.64474	0.203028	1.74352	0.30393	12.0544	0.456521	10.8096	0.455231	2.40294	0.256922	5.21967	0.207289	9.0991	0.144687	0.505336	0.0463489	0.38014	0.0104912	5.82242	0.321397	2.28944	0.0538462	2.92463	0.0472969	2.68364	0.182223	7.56951	0.367188	21.0694	0.735096
	NOy	NOy	CL	12.0964	7.74243	13.68	0.58828	10.8104	0.697905	3.78554	0.459328	18.1617	1.17412	23.677	0.631186	5.72431	0.531058	13.1706	0.396487	15.9034	0.146966	6.30933	0.226934	5.84147	0.0875305	8.84274	0.510089	7.32472	0.126011	9.9263	0.136195	5.65478	0.539269	13.6182	0.662221	31.1125	1.58917
17.031	NH3	Ammonia	Oslo PTR-ToF-MS	17.4432	11.6528	7.86524	2.35957	7.12268	2.1368					18.4106	5.52318	8.89472	2.66842	12.9791	3.89373	32.5128	9.75384	11.9042	3.57126	4.83452	1.45036	12.0653	3.61958	20.4185	6.12554	40.9849	12.2955	31.3258	9.39775
62.0049	pNO3-	Particulate nitrate (g/kg)	AMS	7.30846	2.64545			8.63909	0.739391	4.9461	0.336739	4.67075	0.193039	8.47114	0.365587	8.07488	0.800103	9.04857	0.705434	8.76338	0.118171	9.50471	0.293721	10.1596	0.454463	4.74378	0.422371	7.85866	0.362018	11.3988	0.310688	6.46575	0.438154	0.564838	0.315349	6.31686	0.677451
18.039	pNH4+	Particulate ammonium (g/kg)	AMS	3.23502	1.97483			3.27301	0.259065	2.38159	0.198068	0.849633	0.0868272	7.08873	0.1064	2.37525	0.249603	3.19621	0.257086	2.46245	0.0428994	4.88499	0.0986696	5.6047	0.178408	4.67008	0.201377	3.90798	0.152946	3.82433	0.107104	2.14994	0.146168	0	0	1.85643	0.197233
27.99	CO	Carbon monoxide	DACOM	1000	0	1000	0	1000	3.7992e-14	1000	3.35994e-14	1000	0	1000	6.35601e-14	1000	3.72718e-14	1000	0	1000	0	1000	2.21897e-14	1000	4.2773e-14	1000	5.78467e-14	1000	4.51421e-14	1000	4.32076e-14	1000	4.47702e-14	1000	0	1000	3.58644e-14
16.03	CH4	Methane	DACOM	91.9713	37.0404	102.786	0.696711	107.668	0.819252	0	0	81.7909	3.28893	80.3335	1.81962	107.35	4.95737	96.9664	0.656447	94.5195	0.220889	111.752	1.32677	120.11	0.43872			113.322	1.48704	107.666	0.72291	113.103	0.408212	98.0918	1.2895	44.109	3.09326
43.99	CO2	Carbon dioxide	DACOM	9400.32	2700.05	9918.72	106.197	8649.13	167.988	6529.38	557.688	11224.5	373.654	14453	389.08	10200.2	240.117	9281.35	172.76	9788.24	67.9051	6414.56	109.907	5865.59	101.354	9200.89	164.707	7631.42	118.299	9175.24	94.9961	7720.41	127.218	10075.4	172.7	14277.2	460.45
	BC	Black carbon (g/kg)	SP2	3.26043		0.257892	0.377047	1.69182	0.116217	1.67521	0.310517	5.38947	0.472982	9.15859	0.445095	0.828395	0.164648	3.64561	0.150225	3.61748	0.044645	2.42411	0.124813	1.28736	0.0378149			3.0097	0.115081	2.30943	0.0673921	1.22476	0.164781	3.47579	0.309532	8.91092	0.678937
	OA	Organic aerosol (g/kg)	AMS	240.561	118.125			353.035	35.3035	159.617	15.9617	112.734	11.2734	173.348	17.3348	127.291	12.7291	271.849	27.1849	441.121	44.1121	329.284	32.9284	323.074	32.3074	143.14	14.314	163.498	16.3498	385.822	38.5822	201.472	20.1472	31.3353	3.13353	391.794	39.1794
	OA / OC	Organic aerosol to organic carbon ratio	AMS	1.89127	0.1597			1.72267	0.13	1.99785	0.095	1.91533	0.17	2.00321	0.061	2.08453	0.11	1.78033	0.085	1.74405	0.087	1.86913	0.031	1.81001	0.04	2.05727	0.06	1.92344	0.037	1.82426	0.073	1.80747	0.133	1.84056	0.07	1.98897	0.051
	OC	Organic carbon (g/kg)	AMS	129.542	65.4315			204.935	20.4935	79.8942	7.98942	58.8586	5.88586	86.5354	8.65354	61.0647	6.10647	152.696	15.2696	252.929	25.2929	176.17	17.617	178.493	17.8493	69.5776	6.95776	85.003	8.5003	211.495	21.1495	111.466	11.1466	17.0248	1.70248	196.983	19.6983
30.0469	C2H6	Ethane	iWAS	7.75522	0.0980688	7.78242	0.103848	7.78242	0.103848	6.61778	0.063796			6.47089	0.1432	7.21917	0.0704069	7.53946	0.0670841	7.53946	0.0670841	8.50652	0.152323	8.50652	0.152323	8.25366	0.094103	10.0655	0.121746	10.0655	0.121746	10.0655	0.121746	7.31057	0.101571	2.60299	0.0626104
44.0626	C3H8	Propane	iWAS	1.90381	0.0227898	1.98273	0.0158646	1.98273	0.0158646	1.88272	0.0247511			1.51958	0.0428343	1.55944	0.0135851	1.94703	0.0149752	1.94703	0.0149752	2.10127	0.0439389	2.10127	0.0439389	2.03063	0.0200739	2.69449	0.0288755	2.69449	0.0288755	2.69449	0.0288755	1.41931	0.0229998	0	0
58.0782	C4H10	i-Butane	iWAS	0.121571	0.00199507	0.119886	0.00147962	0.119886	0.00147962	0.151551	0.00215263			0.117658	0.00370959	0.0962818	0.00177034	0.141028	0.0013184	0.141028	0.0013184	0.104492	0.00251186	0.104492	0.00251186	0.141981	0.00223522	0.143363	0.00162372	0.143363	0.00162372	0.143363	0.00162372	0.155189	0.00314935	0	0
58.0782	C4H10	n-Butane	iWAS	0.367522	0.00580513	0.392646	0.00559834	0.392646	0.00559834	0.374443	0.0083862			0.297409	0.0103833	0.283957	0.00337549	0.418394	0.00384141	0.418394	0.00384141	0.323324	0.0086364	0.323324	0.0086364	0.388959	0.0044316	0.479237	0.00477561	0.479237	0.00477561	0.479237	0.00477561	0.461619	0.00862291	0	0
72.0939	C5H12	i-Pentane	iWAS	0.0450161	0.00110363	0.0465035	0.000705706	0.0465035	0.000705706	0	0			0.0358781	0.00249157	0.0322888	0.00117451	0.064672	0.000740011	0.064672	0.000740011	0.0314524	0.00169256	0.0314524	0.00169256	0.0635444	0.0013985	0.0637377	0.00100488	0.0637377	0.00100488	0.0637377	0.00100488	0.0670617	0.00182852	0	0
72.0939	C5H12	n-Pentane	iWAS	0.159407	0.00262652	0.160775	0.00220548	0.160775	0.00220548	0.159736	0.00337184			0.112116	0.00483424	0.104903	0.00139091	0.178261	0.00186144	0.178261	0.00186144	0.146428	0.00421208	0.146428	0.00421208	0.172564	0.00254979	0.230344	0.00243416	0.230344	0.00243416	0.230344	0.00243416	0.179826	0.00340522	0	0
86.1095	C6H14	n-Hexane	iWAS	0.0991198	0.00161947	0.0968445	0.00118144	0.0968445	0.00118144	0.11556	0.00189099			0.0712478	0.00213449	0.0638094	0.00122645	0.108455	0.00108774	0.108455	0.00108774	0.0810036	0.00224057	0.0810036	0.00224057	0.104343	0.00182897	0.135875	0.00145296	0.135875	0.00145296	0.135875	0.00145296	0.151605	0.00315111	0	0
86.1095	C6H14	2-Methylpentane	iWAS	0.0199102	0.000485537	0.0217858	0.000455638	0.0217858	0.000455638	0.0188185	0.000721183			0.0152171	0.000688185	0.0112772	0.000416503	0.0274014	0.000341664	0.0274014	0.000341664	0.0153149	0.000624398	0.0153149	0.000624398	0.0214109	0.000449135	0.0247029	0.00038616	0.0247029	0.00038616	0.0247029	0.00038616	0.0288169	0.00077251	0	0
100.125	C7H16	2,4-Dimethylpentane	iWAS	0.0455265	0.00161659	0.0580083	0.00130228	0.0580083	0.00130228	0.0498009	0.00196833			0.0214872	0.00130209	0.0164977	0.00113401	0.0496615	0.00152294	0.0496615	0.00152294	0.0689448	0.00287819	0.0689448	0.00287819	0.0456189	0.00174945	0.0529906	0.00211421	0.0529906	0.00211421	0.0529906	0.00211421	0.0315789	0.00155894	0.00571337	0.000635461
128.156	C9H20	n-Nonane	iWAS	0.0508587	0.00119846	0.0576602	0.000841332	0.0576602	0.000841332	0.0536542	0.00166209			0.0263946	0.0010443	0.0206762	0.000828278	0.0664249	0.000927934	0.0664249	0.000927934	0.0415111	0.00163741	0.0415111	0.00163741	0.0477304	0.00117521	0.0632385	0.00114684	0.0632385	0.00114684	0.0632385	0.00114684	0.0858114	0.00246945	0.00770596	0.00025176
142.172	C10H22	n-Decane	iWAS	0.0421643	0.00107401	0.053158	0.000884618	0.053158	0.000884618	-0.00685184	0.000931279			0.0269053	0.0010713	0	0	0.05799	0.00094196	0.05799	0.00094196	0.0399393	0.00161066	0.0399393	0.00161066	0.0448854	0.00125736	0.0636424	0.00133054	0.0636424	0.00133054	0.0636424	0.00133054	0.0633826	0.00225416	0.0110406	0.000458196
28.0313	C2H4	Ethene	iWAS	13.5746	0.177806	14.932	0.156765	14.932	0.156765	14.6418	0.277849			13.7486	0.184938	12.8544	0.179268	13.2558	0.136424	13.2558	0.136424	15.4403	0.269596	15.4403	0.269596	12.5584	0.166506	13.311	0.0823312	13.311	0.0823312	13.311	0.0823312	7.40191	0.0679408	15.2246	0.256443
42.047	C3H6	Propene	iWAS	4.79809	0.0908526	5.69824	0.0693963	5.69824	0.0693963	5.35119	0.0858483			3.99721	0.110875	3.56327	0.101882	5.12508	0.0777868	5.12508	0.0777868	6.2673	0.139905	6.2673	0.139905	4.90908	0.123692	4.90727	0.0735513	4.90727	0.0735513	4.90727	0.0735513	3.20309	0.0767419	2.04447	0.0488481
56.0626	C4H8	trans-2-Butene	iWAS	0.166	0.00526758	0.183638	0.00495397	0.183638	0.00495397	0.227398	0.00559111			0.174853	0.00758138	0	0	0.191675	0.00778458	0.191675	0.00778458	0.198175	0.00742442	0.198175	0.00742442	0.189387	0.00756895	0.236109	0.00902326	0.236109	0.00902326	0.236109	0.00902326	0	0	0.0430546	0.00274814
56.0626	C4H8	Butene	iWAS	0.678656	0.0143752	0.832608	0.015681	0.832608	0.015681	0.696815	0.0101317			0.58469	0.0149181	0.483751	0.0131975	0.805289	0.0179862	0.805289	0.0179862	0.833016	0.0236644	0.833016	0.0236644	0.596139	0.0157414	0.675912	0.0101425	0.675912	0.0101425	0.675912	0.0101425	0.608808	0.0159491	0.240076	0.00634009
56.0626	C4H8	i-Butene	iWAS	1.61289	0.0445486	1.46339	0.0221491	1.46339	0.0221491	2.21138	0.0503331			1.54972	0.0497323	1.21157	0.0661712	1.92223	0.0367414	1.92223	0.0367414	1.55197	0.0504267	1.55197	0.0504267	1.7457	0.0529186	1.82308	0.0437039	1.82308	0.0437039	1.82308	0.0437039	1.77504	0.0603932	0.355503	0.0129169
56.0626	C4H8	cis-2-Butene	iWAS	0.189976	0.00623382	0.185304	0.00393343	0.185304	0.00393343	0.237401	0.00529235			0.178185	0.00699992	0.113735	0.00717233	0.200078	0.00649624	0.200078	0.00649624	0.213966	0.00748415	0.213966	0.00748415	0.20943	0.0082119	0.247484	0.00817184	0.247484	0.00817184	0.247484	0.00817184	0.169744	0.00857606	0	0
70.0782	C5H10	2-Methyl-1-Butene	iWAS	0.152805	0.00340831	0.169848	0.00264348	0.169848	0.00264348	0.174804	0.00302979			0.140313	0.00418985	0.0993681	0.00419924	0.172507	0.00279388	0.172507	0.00279388	0.216991	0.00565298	0.216991	0.00565298	0.147264	0.00444514	0.14791	0.00243169	0.14791	0.00243169	0.14791	0.00243169	0.112585	0.00315872	0.0553265	0.00153835
70.0782	C5H10	trans-2-Pentene	iWAS	0.0648505	0.0022304	0.080884	0.00223534	0.080884	0.00223534	0.0847927	0.00218224			0.0573449	0.00279405	0	0	0.0727368	0.00297225	0.0727368	0.00297225	0.0744798	0.00276008	0.0744798	0.00276008	0.0648383	0.00247255	0.0808016	0.00314688	0.0808016	0.00314688	0.0808016	0.00314688	0.0516562	0.00285541	0.0155196	0.000885155
70.0782	C5H10	1-Pentene	iWAS	0.267737	0.00583651	0.311958	0.00510984	0.311958	0.00510984	0.284464	0.00500168			0.247699	0.00631196	0.182802	0.00699349	0.306576	0.00624743	0.306576	0.00624743	0.251505	0.00714239	0.251505	0.00714239	0.279543	0.007887	0.328396	0.00519805	0.328396	0.00519805	0.328396	0.00519805	0.223798	0.00651835	0.0724839	0.00195491
70.0782	C5H10	cis-2-Butene	iWAS	0.0454528	0.00161833	0.0563413	0.001448	0.0563413	0.001448	0.0563389	0.00144783			0.0390335	0.00182865	0.0238368	0.00168658	0.0500038	0.00188598	0.0500038	0.00188598	0.0534784	0.00189631	0.0534784	0.00189631	0.043882	0.00173787	0.0507514	0.00184573	0.0507514	0.00184573	0.0507514	0.00184573	0.0344773	0.00177655	0.0123227	0.000629821
84.0939	C6H12	Methylcyclopentane	iWAS	0.0148232	0.000275457	0.0193678	0.000399597	0.0193678	0.000399597	0.0143497	0.000286825			0.00981616	0.000370923	0.00832507	0.000188856	0.020319	0.000297951	0.020319	0.000297951	0.0124164	0.000412352	0.0124164	0.000412352	0.0148547	0.000244162	0.0177847	0.000225576	0.0177847	0.000225576	0.0177847	0.000225576	0.0174423	0.000328326	0	0
98.1095	C7H14	Methylcyclohexane	iWAS	0.0109842	0.0002479	0.0158855	0.000308129	0.0158855	0.000308129	0	0			0.00697139	0.000217789	0.00577245	0.000371268	0.0173233	0.000370819	0.0173233	0.000370819	0.00879677	0.00032739	0.00879677	0.00032739	0.0111937	0.000185082	0.0125535	0.000220256	0.0125535	0.000220256	0.0125535	0.000220256	0.0191535	0.000478261	0	0
26.0157	C2H2	Ethyne	iWAS	2.90227	0.0576222	3.27455	0.04472	3.27455	0.04472	3.98911	0.108665			4.02584	0.0496018	3.39434	0.089799	2.25151	0.0249644	2.25151	0.0249644	3.57858	0.113431	3.57858	0.113431	2.07762	0.0232081	1.93455	0.0207411	1.93455	0.0207411	1.93455	0.0207411	1.66968	0.0195873	4.36449	0.0815047
68.0626	C5H8	Pentadiene	iWAS	0.123495	0.00765646	0.0602897	0.00265064	0.0602897	0.00265064	0.192066	0.0183723			0.178631	0.00770247	0.126947	0.0145913	0.0865295	0.00339545	0.0865295	0.00339545	0.131381	0.00526131	0.131381	0.00526131	0.167086	0.00495365	0.156188	0.00930229	0.156188	0.00930229	0.156188	0.00930229	0.0913815	0.00605969	0.0713525	0.00427548
68.0626	C5H8	Isoprene	iWAS	0.270691	0.00953932	0.370193	0.00891696	0.370193	0.00891696	0	0			0.306632	0.0392658	0	0	0.38525	0.0115428	0.38525	0.0115428	0.407629	0.0142534	0.407629	0.0142534	0	0	0.475863	0.0214143	0.475863	0.0214143	0.475863	0.0214143	0	0	0	0
112.008	C6H5Cl	Chlorobenzene	WAS	0.000535598	3.02554e-05	0	0	0	0	0	0			0.000163931	0.000110299	0	0	0.00162521	0.000106187	0.00162521	0.000106187	0.00230981	8.60685e-05	0.00230981	8.60685e-05	0	0	0	0	0	0	0	0	0	0	0	0
77.0113	CH3NO3	Methyl nitrate	WAS	0.00827037	0.000336275	0.0133488	0.000379952	0.0133488	0.000379952	0	0			0.0103878	0.000449386	0.0116339	0.000426099	0.010631	0.000477616	0.010631	0.000477616	0	0	0	0	0.00873969	0.000373822	0.00816767	0.000476282	0.00816767	0.000476282	0.00816767	0.000476282	0.007462	0.000327296	0.0133697	0.000452294
91.0269	C2H5NO3	Ethyl nitrate	WAS	0.00186227	9.6339e-05	0.0050066	0.000177847	0.0050066	0.000177847	0	0			0	0	0	0	0.00321383	0.000220014	0.00321383	0.000220014	0.00306805	0.000342301	0.00306805	0.000342301	0.00535716	0.000223228	0	0	0	0	0	0	0	0	0	0
105.043	C3H7NO3	i-Propyl nitrate	WAS	0.00467966	0.000320452	0.00501416	0.000137837	0.00501416	0.000137837	0	0			0.00769933	0.000916431	0.00602314	0.000513893	0.00589233	0.00031465	0.00589233	0.00031465	0.00246459	0.000404036	0.00246459	0.000404036	0.00829607	0.000272752	0.00519782	0.000347799	0.00519782	0.000347799	0.00519782	0.000347799	0.00584074	0.000297119	0	0
105.043	C3H7NO3	n-Propyl nitrate	WAS	0.000475026	3.20874e-05	0.00148557	6.62137e-05	0.00148557	6.62137e-05	0	0			0	0	0	0	0	0	0	0	0.000994811	0.00015633	0.000994811	0.00015633	0.00216463	9.83307e-05	0	0	0	0	0	0	0	0	0	0
119.058	C4H9NO3	2-Butyl nitrate	WAS	0.000841735	5.20465e-05	0.00296836	0.0001216	0.00296836	0.0001216	0	0			0	0	0	0	0	0	0	0	0	0	0	0	0.00668931	0.000398865	0	0	0	0	0	0	0	0	0	0
60.0211	C2H4O2	Methyl formate	WAS	0.0893165	0.00461209	0	0	0	0	0	0			0.153616	0.00766274	0.25003	0.022738	0	0	0	0	0	0	0	0	0.128599	0.00412949	0.203483	0.00708421	0.203483	0.00708421	0.203483	0.00708421	0.116452	0.00266782	0.080603	0.0018386
60.0575	C3H8O	i-Propanol	WAS	0.0149085	0.000567325	0.0654837	0.00376901	0.0654837	0.00376901	0	0			0	0	0	0	0.0463298	0.00190424	0.0463298	0.00190424	0	0	0	0	0	0	0	0	0	0	0	0	0	0	0	0
117.914	CHCl3	Trichloromethane	WAS	0.000217537	3.47223e-05	0.000530183	4.31117e-05	0.000530183	4.31117e-05	0	0			0.00131939	0.000283836	0	0	0.00044165	2.02747e-05	0.00044165	2.02747e-05	0	0	0	0	0	0	0	0	0	0	0	0	0	0	0	0
84.0939	C6H12	1-Hexene	WAS	0.151357	0.00585714	0.22	0.005	0.22	0.005	0.104	0.007	0.204	0.008			0.105	0.007	0.155	0.004	0.155	0.004	0.117	0.006	0.117	0.006			0.162	0.002	0.169	0.008	0.169	0.008	0.132	0.005	0.09	0.007
98.1095	C7H14	1-Heptene	WAS	0.0686429	0.00464286	0.103	0.003	0.103	0.003	0.042	0.01	0.094	0.005			0.043	0.01	0.076	0.005	0.076	0.005	0.053	0.004	0.053	0.004			0.074	0.002	0.076	0.004	0.076	0.004	0.06	0.003	0.032	0.003
112.125	C8H16	1-Octene	WAS	0.0419231	0.00238462	0.056	0.001	0.056	0.001			0.054	0.002			0.024	0.005	0.045	0.003	0.045	0.003	0.03	0.002	0.03	0.002			0.048	0.002	0.051	0.003	0.051	0.003	0.038	0.002	0.017	0.002
126.141	C9H18	1-Nonene	WAS	0.031	0.003	0.048	0.003	0.048	0.003			0.039	0.001			0.034	0.011	0.036	0.003	0.036	0.003	0.02	0.003	0.02	0.003			0.037	0.001	0.027	0.003	0.027	0.003	0.022	0.001	0.009	0.001
40.0313	C3H4	Propyne	WAS	0.361687	0.00748183	0.443	0.005	0.443	0.005	0.249	0.009	0.371	0.007	0.398	0.012	0.342	0.00474567	0.258	0.004	0.258	0.004	0.582	0.02	0.582	0.02	0.274	0.005	0.22	0.003	0.263	0.003	0.263	0.003	0.321	0.005	0.52	0.012
54.047	C4H6	1-Butyne	WAS	0.0295714	0.00141244	0.034	0.001	0.034	0.001			0.027	0.00118863	0.03	0.00192795	0.027	0.00176067	0.019	0.001	0.019	0.001	0.054	0.003	0.054	0.003	0.023	0			0.019	0.001	0.019	0.001	0.024	0.001	0.031	0.001
54.047	C4H6	2-Butyne	WAS	0.0143	0.000375	0.017	0	0.017	0			0.014	0	0.007	0.00152737			0.009	0	0.009	0	0.028	0.001	0.028	0.001	0.008	0.001									0.006	0.001
52.0313	C4H4	1-Buten-3-yne	WAS	0.0696	0.00191473	0.086	0.001	0.086	0.001			0.087	0.001	0.081	0.006	0.057	0.00189144	0.043	0.001	0.043	0.001	0.115	0.004	0.115	0.004	0.054	0.001	0.042	0.001	0.046	0.001	0.046	0.001	0.05	0.001	0.093	0.006
50.0157	C4H2	1,3-Butadiyne	WAS	0.00566667	0.000125	0.006	0	0.006	0			0.005	0					0.003	0	0.003	0	0.008	0	0.008	0	0.004	0									0.008	0.001
120.094	C9H12	i-Propylbenzene	WAS	0.0121182	0.000145018	0.014	0	0.014	0			0.008	0	0.011	0.001	0.01	0.00130516	0.009	0	0.009	0	0.023	0	0.023	0	0.009	0.001									0.0033	0
120.094	C9H12	n-Propylbenzene	WAS	0.0126667	0.0003	0.013	0	0.013	0			0.013	0	0.011	0.001			0.014	0	0.014	0	0.012	0	0.012	0	0.011	0			0.014	0.001	0.014	0.001	0.011	0.001
120.094	C9H12	2-Ethyltoluene	WAS	0.015725	0.00104167	0.022	0.001	0.022	0.001			0.013	0.001					0.017	0.001	0.017	0.001	0.014	0.001	0.014	0.001			0.016	0.002	0.018	0.001	0.018	0.001	0.014	0.001	0.0037	0.0005
120.094	C9H12	3-Ethyltoluene	WAS	0.0269167	0.00155	0.036	0.002	0.036	0.002			0.017	0.001					0.027	0.002	0.027	0.002	0.026	0.001	0.026	0.001			0.039	0.002	0.033	0.002	0.033	0.002	0.015	0.001	0.008	0.0006
120.094	C9H12	4-Ethyltoluene	WAS	0.0185167	0.0013	0.03	0.002	0.03	0.002			0.014	0.001					0.019	0.001	0.019	0.001	0.016	0.001	0.016	0.001			0.018	0.002	0.02	0.001	0.02	0.001	0.016	0.002	0.0042	0.0006
120.094	C9H12	1,2,4-TMB	WAS	0.0274917	0.00198333	0.037	0.002	0.037	0.002			0.021	0.002					0.028	0.003	0.028	0.003	0.027	0.001	0.027	0.001			0.033	0.002	0.032	0.002	0.032	0.002	0.022	0.003	0.0059	0.0008
120.094	C9H12	1,3,5-TMB	WAS	0.00692	0.00098	0.0096	0.0006	0.0096	0.0006			0.005	0.001					0.0059	0.001	0.0059	0.001	0.0082	0.0013	0.0082	0.0013			0.005	0.001	0.0059	0.001	0.0059	0.001
** Speciated C9 aromatics provided by UCI WAS (line 119-125)
Total NMOGs emissions				134.237	21.0747	130.579		146.272		114.53		102.094		120.856		100.374		129.94		133.792		160.434		174.134		121.219		145.117		152.892		144.895		108.503		122.036

## Sheet: S3 Emission Factors
FIREX-AQ Emission Factors by Fire (g/kg)
		Fire		FIREX-AQ Average EFs		Shady		Shady		North Hills		Tucker		Ridgetop		Lick Creek		Williams Flats		Williams Flats		Horsefly		Horsefly		Williams Flats		Castle		Castle		Castle		Sheridan		Blackwater
		Transect number				0		9		0		0		4		1		0		21		1		3		7		0		0		10		1		8
		Time				2019-07-25 22:48:52		2019-07-25 23:47:07		2019-07-29 23:21:21		2019-07-30 02:40:50		2019-08-02 23:18:16		2019-08-03 01:13:13		2019-08-03 22:22:37		2019-08-04 00:41:49		2019-08-06 23:20:14		2019-08-06 23:28:36		2019-08-09 01:49:29		2019-08-13 00:18:44		2019-08-13 23:17:23		2019-08-14 01:32:40		2019-08-17 00:42:03		2019-08-30 17:11:08
		Maleic anhydride to furan (chemical age)		0.136793		0.0885127		0.0698897		0.131313		0.124402		0.142458		0.147153		0.162543		0.135974		0.118823		0.110727		0.110727		0.148048		0.163408		0.0734033		0.150601		0.310707
		Physical age		2859.59		1354		1235		600		1723		2619		1492		887.5		6127		3885		6252.5		5455.5		1539		9196		1597		1216		575
		MCE		0.899507		0.90707		0.89891		0.8616		0.91542		0.93613		0.9108		0.90941		0.90752		0.87231		0.84802		0.9103		0.89261		0.89886		0.88463		0.90724		0.93128
Exact Mass (da)	Chemical formula	NMOG contributor check Table S5, column G for isomers distribution	Instrument	Average EF	Standard deviation	Average EF	Standard deviation	Average EF	Standard deviation	Average EF	Standard deviation	Average EF	Standard deviation	Average EF	Standard deviation	Average EF	Standard deviation	Average EF	Standard deviation	Average EF	Standard deviation	Average EF	Standard deviation	Average EF	Standard deviation	Average EF	Standard deviation	Average EF	Standard deviation	Average EF	Standard deviation	Average EF	Standard deviation	Average EF	Standard deviation	Average EF	Standard deviation
27.0102	HCN	HCN	CIT-CIMS	0.31382	0.122836	0.176083	0.00387828	0.189866	0.0255424	0.519454	0.05065	0.424117	0.016916	0.226724	0.00640309	0.165427	0.00773164	0.490058	0.013956	0.480968	0.0054626	0.352192	0.00560132	0.384593	0.0058287	0.313989	0.0196458	0.309721	0.00683317	0.25768	0.00375267	0.267228	0.00772449	0.27974	0.00799468	0.183273	0.0139133
30.0098	CH2O	Formaldehyde	CAMS & ISAF	2.10476	0.756041	2.25487	0.0365685	2.34227	0.314904	1.66158	0.124202	1.67809	0.0636071	1.55386	0.0547331	1.61552	0.091809	1.67746	0.0533536	1.70544	0.0131835	3.49671	0.0731311	4.27274	0.0902374	1.27337	0.0384959	2.47229	0.0525891	2.32585	0.0314511	1.9762	0.0590757	1.52998	0.0417315	1.83996	0.0880881
32.0255	CH4O	Methanol	NOAA PTR-ToF-MS	1.41997	0.657255	0.884271	0.0709222	1.2865	0.228278	1.83456	0.148293	0.935814	0.0737891	0.589971	0.0343493	1.00126	0.0898409	0.966507	0.189768	0.86002	0.0100425	2.32626	0.0588828	2.73514	0.0625611	1.56392	0.0542936	2.11781	0.0664664	1.67654	0.0530931	2.16582	0.117818	1.1616	0.0705013	0.613454	0.0544949
41.0258	C2H3N	Acetonitrile	NOAA PTR-ToF-MS	0.32261	0.143062	0.195829	0.0165665	0.237335	0.0469189	0.555278	0.0748904	0.466979	0.0370064	0.197614	0.0119373	0.154125	0.0114483	0.490607	0.0433852	0.427283	0.00450931	0.218413	0.00486623	0.234268	0.00540672	0.362241	0.0143515	0.386208	0.0134572	0.312606	0.0100647	0.390559	0.0223024	0.442211	0.0296099	0.0902074	0.0074135
43.0051	HNCO	Isocyanic acid	NOAA PTR-ToF-MS	0.533439	0.31773	0.460308	0.0380102	0.482669	1.12932	0	0	1.24746	0.0953996	0.672665	0.0409954	0	0	0.803956	0.432684	0.730988	0.0100919	0.372277	0.0137793	0.589152	0.0180465	0.508231	0.928712	0.453782	0.488102	0.45715	0.0154033	0.314549	0.0251958	0.575433	0.0338581	0.866411	0.0585481
44.0255	C2H4O	Acetaldehyde	NOAA PTR-ToF-MS	1.95306	0.597588	1.77923	0.139006	2.4138	0.949343	2.05885	0.282341	1.80197	0.134684	1.16356	0.0644835	1.44681	0.107659	1.91228	0.793254	1.67094	0.017591	2.79638	0.0701352	3.43179	0.0794582	1.53578	0.0424169	2.40255	0.0670314	2.10061	0.0643363	2.14976	0.117133	1.38534	0.0801247	1.19926	0.0932635
46.0411	C2H6O	Ethanol	NOAA PTR-ToF-MS	0.0200646	0.0519083	0	0	0	0	0	0	0	0	0	0	0	0	0	0	0	0	0	0	0.161077	0.602504	0.159955	1.03019	0	0	0	0	0	0	0	0	0	0
46.0048	HCOOH	Formic acid	NOAA PTR-ToF-MS	0.603897	0.4242	0.515498	0.037614	0.693247	0.400208	0	0	0	0	0.576717	0.0327783	0	0	0.691483	0.17548	0.414705	0.0079643	0.911691	0.0259692	1.6367	0.0434583	0.823778	0.153578	1.07292	0.0441741	0.826833	0.0305489	0.661898	0.0342712	0.347374	0.019771	0.489507	0.0404008
53.0258	C3H3N	Acrylonitrile	NOAA PTR-ToF-MS	0.0400554	0.0110563	0.0317322	0.00247713	0.0399408	0.0310341	0.0314838	0.376026	0.0649346	0.00546895	0.0326376	0.00205839	0.0204388	0.00162897	0.0573711	0.235887	0.0540725	0.000725179	0.037424	0.00120331	0.0457329	0.00109995	0.0440416	0.00273978	0.0341007	0.00173512	0.0344604	0.00129608	0.0338723	0.002158	0.0465612	0.00294846	0.0320822	0.002523
56.0255	C3H4O	Acrolein	NOAA PTR-ToF-MS	0.884796	0.839879	0.677198	0.0513597	0.965659	1.12335	0.574259	0.0992675	0.514831	0.0371081	0.366574	0.0209536	0.51936	0.0363943	0.515849	0.219752	0.491096	0.00511317	2.71132	0.0734968	3.46371	0.0812062	0.480716	0.0128714	0.700004	0.0206766	0.660878	0.0192067	0.618916	0.0334	0.414914	0.0226251	0.481447	0.036928
58.0411	C3H6O	Acetone + Propanal	NOAA PTR-ToF-MS for the sum	0.934885	0.371026	0.717529	0.0576393	0.996273	0.144431	1.62782	0.120822	0.694328	0.0564729	0.534318	0.0312398	0.598921	0.0610175	0.895079	0.0787669	0.772517	0.00824922	1.01282	0.0248406	1.37215	0.0342	1.12042	0.0286263	1.31458	0.0388954	1.04693	0.0331677	1.18803	0.0627426	0.672595	0.0419747	0.393837	0.0340173
60.0204	C2H4O2	Acetic acid + Glycolaldehyde	NOAA PTR-ToF-MS for the sum	2.0931	0.625554	1.66795	0.127756	2.33137	162.91	2.36615	0.233877	2.18763	0.155179	1.09901	0.060399	1.2862	0.0896509	2.14995	0.359302	1.7645	0.0179397	2.66908	0.0703675	3.3842	0.0739013	1.79636	0.0538401	2.4454	0.0765801	2.65085	0.08035	2.58723	0.138551	1.86398	0.102826	1.23966	0.0987673
61.0157	CH3NO2	Nitromethane	NOAA PTR-ToF-MS	0.0517647	0.0268496	0.0455469	0.00388823	0.0584594	0.143663	0	0	0.0470434	0.00367335	0.0475589	0.00278164	0.0419956	0.00367851	0.0512019	1.49795	0.0513384	0.000695734	0.0743936	0.00253965	0.115852	0.00441676	0.0476426	0.0027513	0.0378546	0.00238812	0.0492934	0.00173219	0.0339031	0.00230631	0.0364078	0.00232847	0.0897436	0.00699356
62.0183	C2H6S	Dimethyl sulfide + Other unidentified organic compounds	NOAA PTR-ToF-MS	0.00204678	0.00154512	0.00206707	0.0740362	0.00208069	0.0267734	0	0	0	0	0.0019494	0.0268411	0	0	0.00380624	0.0487614	0.00294415	9.29539e-05	0.00294743	0.0139576	0.00282917	0.0141547	0.00274386	0.0180756	0	0	0.00432997	0.0670168	0.00390577	0.0122725	0	0	0.00314479	0.000373438
67.0415	C4H5N	Pyrrole	TOGA	0.011632	0.00501184	0.00920688	8.61925e-05	0.0111888	0.00160993	0.00779646	0.00102063	0.0224933	0.00177338	0.00782716	0.000474402	0.00476889	0.000604111	0.0125814	0.00127363	0.0193693	0.000111419	0.00667464	8.77367e-05	0.0137126	0.00125079	0.00626432	9.30631e-05	0.0113	0.000767242	0.0121507	0.000648794	0.0122298	0.000160727	0.0200856	0.00179668	0.00846153	0.00050997
67.0415	C4H5N	Butene nitrile isomers	TOGA	0.00697918	0.0030071	0.00552413	5.17155e-05	0.00671328	0.00096596	0.00467788	0.000612378	0.013496	0.00106403	0.0046963	0.000284641	0.00286134	0.000362466	0.00754886	0.000764177	0.0116216	6.68515e-05	0.00400479	5.2642e-05	0.00822757	0.000750473	0.00375859	5.58379e-05	0.00678001	0.000460345	0.00729045	0.000389276	0.00733785	9.64365e-05	0.0120514	0.00107801	0.00507692	0.000305982
68.0255	C4H4O	Furan	TOGA	0.352922	0.130113	0.364413	0.0119566	0.434994	0.0621836	0.302442	0.0649268	0.257092	0.0171178	0.151005	0.00745456	0.272671	0.0176091	0.254862	0.0215178	0.36053	0.003887	0.64333	0.0126041	0.353301	0.0204972	0.54852	0.01003	0.284109	0.00670967	0.401176	0.0124736	0.449945	0.00999551	0.393749	0.0270959	0.174607	0.0112178
72.0568	C4H8O	MEK	NOAA PTR-ToF-MS	0.239869	0.0838825	0.177381	0.0139559	0.248093	0.172913	0.304422	0.0501487	0.194136	0.016181	0.126706	0.00765785	0.161047	0.0123359	0.25477	0.0789937	0.217115	0.00250722	0.276689	0.00758668	0.334539	0.00764235	0.248639	0.00713992	0.368363	0.0122689	0.30669	0.0102117	0.352444	0.0172438	0.1886	0.0125753	0.0782737	0.00641177
72.0568	C4H8O	Butanal	TOGA	0.0601501	0.019055	0.0514573	0.000838328	0.0617986	0.00863216	0.0590676	0.0123182	0.050286	0.00453946	0.0330526	0.00166366	0.0413127	0.0034381	0.0520351	0.0049899	0.0564238	0.000731984	0.0718114	0.00209048	0.0418965	0.00314054	0.0574186	0.00110361	0.0783132	0.00196269	0.0872115	0.00365939	0.0908682	0.00200318	0.0931085	0.00804144	0.0363398	0.00270814
72.0568	C4H8O	2-Methylpropanal	TOGA	0.0462693	0.0146577	0.0395825	0.000644868	0.0475374	0.00664012	0.0454366	0.00947557	0.0386816	0.00349189	0.0254251	0.00127974	0.031779	0.00264469	0.040027	0.00383838	0.0434029	0.000563065	0.0552395	0.00160806	0.032228	0.0024158	0.0441681	0.000848929	0.060241	0.00150976	0.0670858	0.00281492	0.0698986	0.00154091	0.0716219	0.00618573	0.0279537	0.00208318
74.0361	C3H6O2	Methyl acetate + Ethyl formate + Hydroxyacetone	NOAA PTR-ToF-MS for the sum	0.805824	0.350765	0.67392	0.0521719	0.977925	0.811678	0.876633	0.11397	0.556635	0.0432549	0.359592	0.0192469	0.548778	0.040806	0.55586	0.157543	0.512885	0.00541734	1.34807	0.0395105	1.54718	0.0350195	0.638784	0.0158688	1.26627	0.0368875	0.94637	0.0269463	1.08244	0.0554713	0.532095	0.0291761	0.469752	0.037345
78.0462	C6H6	Benzene	NOAA PTR-ToF-MS	0.691578	0.179449	0.637513	0.0494013	0.854538	1.60588	0.856624	0.29736	0.60204	0.0447188	0.394627	0.0215902	0.61007	0.0462824	0.684328	0.165094	0.618847	0.00609779	0.918495	0.023361	1.02093	0.0222593	0.637608	0.0161401	0.830336	0.0259581	0.669201	0.0208292	0.748587	0.0429209	0.463065	0.0281732	0.51844	0.0411368
82.0411	C5H6O	2-Methylfuran	TOGA	0.110019	0.0379525	0.116814	0.00308466	0.145878	0.0204701	0.106518	0.0210115	0.086364	0.00613422	0.0517658	0.00239765	0.0887052	0.00589143	0.0783366	0.00700688	0.102052	0.00109082	0.18231	0.00516382	0.0852008	0.0056829	0.155035	0.00302589	0.102071	0.00270097	0.129222	0.00465533	0.134659	0.0028655	0.14898	0.0117723	0.046389	0.00310507
82.0411	C5H6O	3-Methylfuran	TOGA	0.0185657	0.00640449	0.0197124	0.000520536	0.0246169	0.00345433	0.0179749	0.00354569	0.0145739	0.00103515	0.00873548	0.000404604	0.014969	0.000994178	0.0132193	0.00118241	0.0172212	0.000184075	0.0307648	0.000871395	0.0143776	0.00095899	0.0261621	0.000510619	0.0172244	0.000455788	0.0218062	0.000785587	0.0227237	0.000483554	0.0251404	0.00198657	0.00782814	0.000523981
84.0204	C4H4O2	2(3H)-Furanone	NOAA PTR-ToF-MS	0.537098	0.25042	0.53165	0.0335246	0.567972	0.094712	0.558806	0.326091	0.370881	0.0239079	0.252126	0.011812	0.340484	0.019385	0.385564	0.0303624	0.562031	0.010985	0.901946	0.0217863	1.26836	0.040043	0.288719	0.00906476	0.6186	0.0274822	0.649052	0.0211421	0.5557	0.0318587	0.295486	0.0133161	0.446198	0.031638
86.0361	C4H6O2	2,3-Butanedione + 2-Oxobutanal + 1,4-Butanedial	NOAA PTR-ToF-MS for the sum	0.492845	0.20447	0.453868	0.0310347	0.660703	0.722281	0.539421	0.126729	0.404406	0.0275254	0.201939	0.0102181	0.357681	0.0248528	0.376314	0.245111	0.383001	0.00398603	0.778299	0.0205912	0.914253	0.021287	0.278118	0.00655766	0.680655	0.0220474	0.588388	0.0154696	0.673693	0.0306259	0.310412	0.0156235	0.284363	0.0210683
92.0619	C7H8	Toluene	NOAA PTR-ToF-MS	0.528972	0.221446	0.440906	0.033868	0.639969	0.41577	0.847489	0.233065	0.340996	0.0254155	0.294451	0.0160398	0.302501	0.0210227	0.548435	0.311024	0.515836	0.00526948	0.762216	0.0215669	0.848847	0.0188129	0.467449	0.0152563	0.772879	0.0212944	0.555726	0.016757	0.653489	0.035855	0.291899	0.0177466	0.180462	0.0145765
94.0411	C6H6O	Phenol	CIT-CIMS	0.156085	0.0543645	0.100399	0.00222309	0.138932	0.0184667	0.115073	0.0129735	0.139251	0.00658617	0.0883283	0.0033073	0.192676	0.00665867	0.175832	0.00503208	0.200087	0.00175265	0.162765	0.00270898	0.0777433	0.00724499	0.202839	0.00337126	0.124676	0.00251508	0.236097	0.00618112	0.21292	0.0032275	0.241913	0.00806828	0.0878354	0.0025681
96.0204	C5H4O2	2-Furfural	TOGA	0.179141	0.0601565	0.169421	0.00418062	0.202408	0.0286835	0.156133	0.0303755	0.132762	0.00916738	0.0794698	0.00381071	0.123218	0.00864368	0.126066	0.0112761	0.16645	0.00176235	0.275513	0.00555055	0.27653	0.0183791	0.223441	0.00407789	0.171858	0.00439501	0.220852	0.00752161	0.233933	0.0047546	0.207736	0.0144727	0.100473	0.00634121
96.0204	C5H4O2	3-Furfural	TOGA	0.0179141	0.00601565	0.0169421	0.000418062	0.0202408	0.00286835	0.0156133	0.00303755	0.0132762	0.000916738	0.00794698	0.000381071	0.0123218	0.000864368	0.0126066	0.00112761	0.016645	0.000176235	0.0275513	0.000555055	0.027653	0.00183791	0.0223441	0.000407789	0.0171858	0.000439501	0.0220852	0.000752161	0.0233933	0.00047546	0.0207736	0.00144727	0.0100473	0.000634121
96.0568	C6H8O	2,5-Dimethylfuran + 2-Ethylfuran + Other unidentified organic compounds	NOAA PTR-ToF-MS for the sum	0.411471	0.161223	0.397922	0.0279033	0.580023	0.968729	0.505513	0.185337	0.346409	0.0228264	0.197302	0.0107275	0.293016	0.019059	0.356192	0.32547	0.379351	0.00447349	0.603423	0.0194249	0.698988	0.0148782	0.287818	0.0084762	0.518996	0.0164092	0.468392	0.0119719	0.577661	0.031657	0.229002	0.0121134	0.14353	0.0114976
103.04	C7H5N	Benzonitrile	NOAA PTR-ToF-MS	0.080804	0.0280655	0.0631365	0.00449861	0.0741811	0.0436473	0.108726	0.0920196	0.0982973	0.00720046	0.0376037	0.00245665	0.0429438	0.00283953	0.119493	0.0361474	0.102691	0.0011239	0.0852671	0.00231478	0.0937491	0.0021934	0.0916315	0.00353196	0.0974782	0.00397412	0.076909	0.00245705	0.0919282	0.00541697	0.0854445	0.00574126	0.0233837	0.00224081
104.15	C8H8	Styrene	NOAA PTR-ToF-MS	0.107176	0.040213	0.107748	0.00736762	0.135886	0.0226994	0.159802	0.120046	0.0889037	0.00682434	0.067837	0.00369979	0.0645944	0.00452931	0.0848124	0.00677943	0.121689	0.00147624	0.157859	0.0045504	0.194698	0.00442057	0.083599	0.00292453	0.119598	0.00601807	0.0919313	0.00276456	0.10468	0.00665667	0.0490479	0.00292597	0.0821327	0.00757214
106.12	C7H6O	Benzaldehyde	NOAA PTR-ToF-MS	0.145687	0.0503022	0.149706	0.00845107	0.169667	0.0267885	0.196819	0.272197	0.113992	0.00643127	0.0875219	0.00456721	0.108948	0.00606738	0.120156	0.00916504	0.152631	0.00150237	0.212848	0.00488413	0.256328	0.005332	0.101466	0.0045674	0.1757	0.00702699	0.152882	0.00472835	0.161103	0.00690053	0.0741695	0.00389646	0.097059	0.00692946
106.167	C8H10	Ethylbenzene + p-/m-/o-Xylenes	NOAA PTR-ToF-MS for the sum	0.198629	0.0788803	0.17682	0.0124842	0.266645	0.200509	0.296404	0.0802812	0.13191	0.00832481	0.119367	0.00606372	0.106039	0.00896349	0.200386	0.169082	0.195735	0.00205467	0.229721	0.0060429	0.274758	0.00628127	0.167654	0.00520111	0.321008	0.0113656	0.245695	0.00780318	0.271644	0.0179256	0.107963	0.0062405	0.0663133	0.00526262
108.14	C7H8O	2-Methylphenol (=o-cresol) + Anisol	NOAA PTR-ToF-MS for the sum	0.567362	0.219886	0.567739	0.0275568	0.620869	0.0943879	0.538595	0.073284	0.43184	0.0226729	0.275469	0.0111788	0.451446	0.0216614	0.50489	0.0271267	0.693696	0.00683604	0.768893	0.0187869	0.965515	0.0178865	0.385958	0.00952269	0.835032	0.0204532	0.682304	0.0144335	0.853127	0.0278578	0.287217	0.0099673	0.215197	0.0154317
118.1	C8H6O	Benzofuran	NOAA PTR-ToF-MS	0.0668022	0.0234297	0.0672867	0.00392099	0.0760077	0.0120914	0.0656694	0.279126	0.0493713	0.00333507	0.0331357	0.00201037	0.0488038	0.00407607	0.0533329	0.00391178	0.0760237	0.000868614	0.0949607	0.0029168	0.114171	0.00286968	0.0550999	0.00235716	0.0909261	0.88426	0.0739329	0.0027143	0.0934119	0.00672029	0.0354103	0.00243391	0.041291	0.00309758
120.19	C9H12	C9 Aromatics**	NOAA PTR-ToF-MS	0.0838755	0.0451481	0.0737607	0.00504006	0.0960753	0.0159863	0	0	0.0581606	0.00536989	0.0573827	0.00292608	0.0460202	0.00517198	0.0896419	0.0851555	0.0915225	0.00105688	0.11032	0.00249481	0.12796	0.00295686	0.0834001	0.0026721	0.166845	0.00669156	0.112582	0.00350116	0.143376	0.00931919	0.0495311	0.0036479	0.0354308	0.00298344
124.09	C6H4O3	Hydroxy benzoquinone	NOAA PTR-ToF-MS	0.117061	0.0630026	0.0784017	0.00399264	0.0808558	0.0120849	0.151442	0.309379	0.0722932	0.00374494	0.0421621	0.00227708	0.0973135	0.00453554	0.080774	0.00486846	0.105335	0.0010241	0.242829	0.00534909	0.260161	0.00597569	0.0468856	0.00203219	0.157626	0.00828423	0.145322	0.00364561	0.145002	0.00766311	0.0658752	0.00319123	0.100697	0.00589697
124.14	C7H8O2	Guaiacol (=2-Methoxyphenol)	NOAA PTR-ToF-MS	0.698236	0.341918	0.741858	0.0357417	0.848931	0.1271	0.865919	0.520035	0.423112	0.0206963	0.227489	0.0100764	0.487111	0.0220874	0.50507	0.0340555	0.715873	0.00705618	0.97676	0.0225955	1.14785	0.0230111	0.425054	0.0173262	1.13249	0.0323803	0.923356	0.0226366	1.25565	0.0387398	0.256736	0.0108171	0.238517	0.0128551
128.171	C10H8	Naphthalene	NOAA PTR-ToF-MS	0.0769817	0.0354734	0.0857971	0.00625762	0.121885	0.0183794	0	0	0.0723677	0.00519105	0.0511417	0.00346181	0.050474	0.08881	0.0582902	0.00436519	0.0639937	0.000992526	0.0809751	0.00421946	0.110056	0.00362818	0.0723603	0.00367748	0.110291	0.265266	0.0873413	0.00447811	0.0935576	0.00821116	0.0501994	0.00413194	0.122977	0.00901916
136.24	C10H16	Monoterpenes	NOAA PTR-ToF-MS	0.472147	0.478443	0.316595	0.0248354	0.572399	0.230097	1.52598	0.354484	0.0827969	0.00815804	0.235376	0.0169388	0	0	0.290375	0.184111	0.391024	0.00552718	0.443873	0.016303	0.486406	0.0131874	0.404807	0.0130958	1.04532	0.0375527	0.601401	0.025294	1.10357	0.0568864	0.0544359	0.0299787	0	0
138.16	C8H10O2	2-Methoxy-4-methylphenol (= Creosol)	NOAA PTR-ToF-MS	0.469176	0.262348	0.505859	0.0244301	0.583655	0.0878195	0.605265	0.289584	0.260875	0.0140097	0.143978	0.0059101	0.340665	0.0167634	0.289741	0.0166015	0.432547	0.00438599	0.80517	0.022741	0.916353	0.0185561	0.217578	0.00973225	0.716321	0.0192525	0.580519	0.0139793	0.842399	0.0249948	0.149658	0.00645753	0.116233	0.00826199
154.17	C8H10O3	Syringol	NOAA PTR-ToF-MS	0.0466898	0.0345849	0.0366991	0.519006	0.0229395	0.00386365	0	0	0.0810396	0.0750325	0.0179245	0.0214946	0	0	0.0373199	0.0621514	0.0453784	0.000929752	0.0484188	0.00305933	0.0624922	0.00308022	0.0205833	0.0623029	0.0953663	0.148389	0.0599535	0.00357838	0.102382	0.303354	0.101123	0.278289	0.0154157	0.00191479
110.11	C6H6O2	5-Methylfurfural + Benzene diols (=Catechol, Resorcinol)	NOAA PTR-ToF-MS for the sum	1.19732	0.481772	1.2964	0.0732558	1.44286	0.226998	1.60121	1.2118	0.808911	0.0453045	0.495587	0.0247262	0.824579	0.0434092	0.888801	0.0640895	1.40741	0.0172892	1.87231	0.0480948	2.11816	0.045306	0.740329	0.0202212	1.46252	0.0455715	1.27461	0.0314465	1.47584	0.0680429	0.610586	0.0275128	0.837016	0.0455057
70.0898	C4H6O	MVK + Methacrolein + 2-Butenal (=Crotonaldehyde)	NOAA PTR-ToF-MS for the sum	0.711921	0.264168	0.673604	0.0470247	0.974362	0.629284	0.634863	0.0739093	0.582351	0.0403534	0.406035	0.0216741	0.48486	0.0345058	0.584421	0.501268	0.57653	0.00599634	1.14046	0.0278105	1.39392	0.0309749	0.545888	0.0150201	0.881317	0.026656	0.759544	0.0212918	0.79365	0.0375316	0.470386	0.0247417	0.488554	0.0416742
58.04	CHOCHO	Glyoxal	ACES	0.21623	0.201853	0.291792	0.0101967	0.287195	0.0416896	0	0	0.196572	0.00935571	0	0	0	0	0.210927	0.00991346	0.245926	0.00202785	0.568152	0.0112738	0.683664	0.0147156	0	0	0	0	0.265258	0.00794313	0.204453	0.0135616	0.163028	0.0128829	0.342718	0.024008
72.06266	CH3COCHO	Methyl glyoxal	ACES	0.436794	0.367648					0	0	0.679256	0.0496648	0	0	0	0	0.502395	0.027984	0.653198	0.00742844	0.955671	0.0349183	0.901766	0.0268775	0	0	0	0	0.69581	0.0381839	0.683176	0.0544882	0.553642	0.0441132	0.490207	0.0476328
47.013	HONO	Nitrous acid	NOAA CIMS	0.302222	0.207125	0.454404	0.0229663	0.465278	0.0670877	0.0865997	0.0123961	0.707662	0.0714286	0.396232	0.0367357	0.211438	0.00812995	0.185577	0.147127	0.486854	0.00847528	0.211325	0.0087267	0.105387	0.198977	0.216578	0.0076412	0.0732277	0.00352834	0.0945554	0.00301531	0.128625	0.00282477	0.29806	0.0156272	0.713743	0.0324934
108.01	N2O5	Dinitrogen pentoxide	NOAA CIMS	0.000189538	0.000240148	0.000257642	2.42327e-05	0.000176797	2.72893e-05	0	0	0	0	0.000633044	4.30548e-05	0	0	0.000426976	0.000774812	0.000210944	4.24686e-06	0	0	0	0	0.000412882	0.00161305	0	0	0	0	0	0	0.000378067	2.29878e-05	0.000536262	5.49816e-05
30.01	NO	Nitric oxide	CL	0.140359	0.12568	0.221263	0.0105585	0.166978	0.0145289	0.0689482	0.0121427	0.127469	0.0173375	0.428654	0.0118932	0.0589606	0.00245726	0.16044	0.0080076	0.0640705	0.00285327	0.00815675	0.00131353	0.00348445	0.000140898	0.141474	0.0148254	0.0969653	0.00447963	0.10645	0.00273874	0.0775218	0.00708071	0.21374	0.0200747	0.301172	0.0179734
46.0055	NO2	Nitrogen dioxide	CL	0.930777	0.634351	1.11127	0.0262661	1.00869	0.0397631	0.404518	0.075625	1.80427	0.0862616	1.28307	0.0622571	0.388143	0.0422516	0.900957	0.0384898	1.4529	0.0245686	0.115454	0.0106972	0.0896825	0.00272951	1.04033	0.059628	0.45547	0.0121127	0.497925	0.00910654	0.529774	0.0366851	1.26688	0.0643564	2.54308	0.115457
	NOy	NOy	CL
17.031	NH3	Ammonia	Oslo PTR-ToF-MS	1.15256	0.74298	0.490557	0.147239	0.476359	0.155998					0.813497	0.244844	0.538786	0.162015	0.829662	0.249241	1.93915	0.581851	1.00924	0.303063	0.449095	0.134864	0.768011	0.230686	1.56303	0.46934	2.66336	0.799366	2.28996	0.687646
62.0049	pNO3-	Particulate nitrate (g/kg)	AMS	0.835808	0.293697			0.939235	0.0818018	0.698178	0.0669614	0.425339	0.021519	0.611752	0.030239	0.793555	0.0802853	0.950242	0.0755777	0.851341	0.0124812	1.32118	0.0443558	1.45825	0.0678619	0.515689	0.0465997	0.951201	0.0453809	1.18072	0.0337251	0.776565	0.0536711	0.6	0.3	0.463877	0.0515413
18.039	pNH4+	Particulate ammonium (g/kg)	AMS	0.356298	0.206653			0.355839	0.0287445	0.33618	0.0360199	0.0773713	0.00822289	0.511919	0.0145347	0.233427	0.0249893	0.335653	0.0275106	0.239221	0.00438894	0.679027	0.0163552	0.804469	0.0276099	0.507677	0.0232508	0.473017	0.0194211	0.396134	0.0115985	0.258216	0.0179024	0	0	0.136326	0.0150155
27.99	CO	Carbon monoxide	DACOM	109.147	24.6454	102.504	0.959616	109.914	14.4333	144.669	10.0142	91.6195	2.6897	72.6191	1.7596	99.5513	2.04538	105.056	1.65337	98.0209	0.563852	139.334	1.83152	152.668	2.05648	104.615	1.55416	125.808	1.61907	106.799	0.961105	120.14	1.57892	98.6563	1.45013	74.3729	2.18395
16.03	CH4	Methane	DACOM	5.80515	2.92055	6.03401	0.069741	6.77753	0.891482	0	0	4.29164	0.213671	3.34101	0.110818	6.1204	0.309349	5.83406	0.0999509	5.30604	0.032945	8.91751	0.157953	10.5017	0.146569			8.1649	0.150069	6.58536	0.0739403	7.78203	0.106061	5.54228	0.109292	1.87876	0.142838
43.99	CO2	Carbon dioxide	DACOM	1533.82	79.3271	1597.89	22.7259	1494.09	198.33	1484.56	163.213	1616.23	71.7366	1649.53	59.7445	1595.9	49.865	1532.43	37.3534	1507.91	13.5894	1404.67	30.3343	1407.38	30.835	1512.78	35.1913	1508.91	30.4008	1540.06	21.1263	1457.74	30.725	1562.2	35.2747	1668.82	72.7881
	BC	Black carbon (g/kg)	SP2	0.313024	0.195465	0.026446	3.86656e-05	0.183933	1.29789e-05	0.236468	4.66519e-05	0.490789	4.53904e-05	0.661397	3.58784e-05	0.0814102	1.6266e-05	0.382846	1.68886e-05	0.351429	4.78526e-06	0.336957	1.79039e-05	0.18478	5.92303e-06			0.364289	1.46448e-05	0.239217	7.27353e-06	0.147099	1.98915e-05	0.353927	3.19673e-05	0.654371	5.33587e-05
	OA	Organic aerosol (g/kg)	AMS	26.5114	13.9698			38.8036	5.24918	23.0915	1.73802	10.3286	0.356586	12.5884	0.473062	12.672	1.4283	28.5592	1.42579	43.2391	0.631828	45.8805	0.788339	49.323	1.14624	14.9746	0.565517	20.5693	2.37284	41.2056	0.926056	24.2049	1.36144	3.09142	0.129778	29.1388	2.16292
	OA / OC	Organic aerosol to organic carbon ratio	AMS
	OC	Organic carbon (g/kg)	AMS
30.0469	C2H6	Ethane	iWAS	0.906174	0.266799	0.856353	0.0139589	0.918261	0.121202	1.02774	0.0718284			0.504443	0.0165535	0.771492	0.0175463	0.85027	0.0153721	0.793334	0.00840558	1.27235	0.0282631	0.955307	0.022227	1.11468	0.0191652	1.15398	0.0173974	1.29813	0.0231861	1.066	0.0202919	0.583664	0.0189609	0.426597	0.0117605
44.0626	C3H8	Propane	iWAS	0.325914	0.134542	0.319942	0.00394015	0.343072	0.0451339	0.428772	0.0302108			0.173717	0.00645726	0.244389	0.00545393	0.322002	0.00564047	0.30044	0.00288557	0.460899	0.0113837	0.346052	0.00887648	0.402165	0.00652631	0.453015	0.00633943	0.509603	0.0086417	0.418474	0.0076123	0.166172	0.00557333	0	0
58.0782	C4H10	i-Butane	iWAS	0.0270759	0.0108757	0.0254987	0.000394996	0.0273421	0.00360624	0.0454929	0.0032147			0.017729	0.000704973	0.0198885	0.000548368	0.0307423	0.000562742	0.0286837	0.000314847	0.0302101	0.000827694	0.0226823	0.000640978	0.0370637	0.000753648	0.0317698	0.000459579	0.0357383	0.000620035	0.0293475	0.000544578	0.023949	0.000854857	0	0
58.0782	C4H10	n-Butane	iWAS	0.0816962	0.0306662	0.0835126	0.00142445	0.0895499	0.0118283	0.112401	0.00817768			0.0448141	0.00190447	0.0586558	0.00139232	0.0912042	0.00166177	0.085097	0.000921984	0.0934772	0.00278286	0.0701845	0.00214516	0.101536	0.00174522	0.106201	0.00142597	0.119467	0.00197039	0.0981038	0.00174216	0.0712375	0.00247926	0	0
72.0939	C5H12	i-Pentane	iWAS	0.0120609	0.00676279	0.0122778	0.000218922	0.0131654	0.00174032	0	0			0.00671083	0.00049359	0.00827931	0.000345881	0.0174997	0.000340511	0.0163279	0.000209113	0.0112877	0.000625289	0.00847506	0.000473131	0.0205911	0.000524966	0.0175332	0.000318286	0.0197233	0.000404824	0.0161963	0.000349111	0.0128465	0.000514783	0	0
72.0939	C5H12	n-Pentane	iWAS	0.0442763	0.0184582	0.0424477	0.000704966	0.0455163	0.00600948	0.0595214	0.00430747			0.0209708	0.00103722	0.0268986	0.000657747	0.0482359	0.00091104	0.045006	0.000536553	0.0525504	0.00166199	0.0394559	0.0012774	0.055918	0.00109569	0.0633638	0.000879495	0.0712789	0.00120204	0.0585326	0.00105963	0.034448	0.00120365	0	0
86.1095	C6H14	n-Hexane	iWAS	0.0326603	0.0140337	0.0305396	0.000469622	0.0327474	0.00431873	0.0514316	0.0036583			0.0159174	0.000613312	0.0195425	0.000549824	0.0350525	0.000654151	0.0327053	0.000378135	0.0347224	0.00106336	0.0260703	0.000818535	0.0403848	0.000878189	0.0446434	0.000623942	0.05022	0.000850881	0.0412395	0.000749609	0.0346878	0.00124795	0	0
86.1095	C6H14	2-Methylpentane	iWAS	0.00651354	0.00254306	0.00687008	0.000157422	0.00736674	0.000979553	0.00837544	0.00066268			0.00339964	0.000174424	0.00345381	0.000145969	0.00885604	0.000177819	0.00826303	0.000113466	0.00656476	0.000281217	0.00492896	0.000213882	0.00828686	0.00020394	0.00811643	0.0001464	0.00913029	0.000186465	0.00749759	0.000160879	0.00659341	0.000262161	0	0
100.125	C7H16	2,4-Dimethylpentane	iWAS	0.0180879	0.00896897	0.0212702	0.000517368	0.0228079	0.00303846	0.0257722	0.00205432			0.00558176	0.000364283	0.00587504	0.000421491	0.0186629	0.000643293	0.0174132	0.000543314	0.0343636	0.00150399	0.0258009	0.00114326	0.0205301	0.000830465	0.0202445	0.000828004	0.0227734	0.000956632	0.018701	0.000795152	0.0084014	0.000482576	0.00312019	0.000349574
128.156	C9H20	n-Nonane	iWAS	0.0249551	0.01019	0.0270617	0.000469148	0.029018	0.00383394	0.0355399	0.00269524			0.00877615	0.000407169	0.00942446	0.000424299	0.0319513	0.000672372	0.0298118	0.000450386	0.0264825	0.00110108	0.0198836	0.000838093	0.0274941	0.000763849	0.0309234	0.000626053	0.0347862	0.000779091	0.0285656	0.000666835	0.0292212	0.00120143	0.00538657	0.000190355
142.172	C10H22	n-Decane	iWAS	0.0228685	0.0130937	0.0276771	0.000528462	0.0296779	0.00392832	0	0			0.0099243	0.000462577	0	0	0.0309445	0.000699877	0.0288724	0.000497529	0.0282664	0.00119894	0.0212229	0.0009121	0.0286829	0.000884222	0.0345244	0.000785814	0.038837	0.000959049	0.0318921	0.000815051	0.023944	0.00110431	0.00856156	0.00037356
28.0313	C2H4	Ethene	iWAS	1.52327	0.465284	1.53284	0.0215616	1.64366	0.216525	2.12133	0.152259			0.999885	0.0277107	1.28156	0.0318238	1.39465	0.0262255	1.30126	0.0153421	2.15453	0.047088	1.61767	0.0370856	1.58227	0.0292361	1.4237	0.0155465	1.60154	0.0232625	1.31515	0.0209729	0.551314	0.0169617	2.32773	0.050204
42.047	C3H6	Propene	iWAS	0.797673	0.280401	0.877431	0.0134782	0.940863	0.124079	1.16294	0.0826339			0.436053	0.0160602	0.532877	0.0187619	0.808819	0.0176842	0.754659	0.012249	1.31181	0.0339831	0.98493	0.0264104	0.927766	0.0262493	0.787299	0.0137638	0.885644	0.0176545	0.727271	0.0152675	0.357862	0.0135625	0.468877	0.0128606
56.0626	C4H8	trans-2-Butene	iWAS	0.0372746	0.0199669	0.0377027	0.0010766	0.0404283	0.0054197	0.0658919	0.00484032			0.0254328	0.00126324	0	0	0.0403324	0.00175673	0.0376317	0.00154361	0.0553067	0.00219584	0.0415254	0.00167355	0.047723	0.00200372	0.0505069	0.00198299	0.0568159	0.00229611	0.046656	0.00191037	0	0	0.0131655	0.000858853
56.0626	C4H8	Butene	iWAS	0.148491	0.0473414	0.170943	0.00359528	0.183301	0.0243164	0.201912	0.0142816			0.0850446	0.00299245	0.0964582	0.00329433	0.16945	0.00462986	0.158103	0.00364648	0.232478	0.00727696	0.174549	0.0055957	0.150219	0.00441264	0.144587	0.00252988	0.162648	0.00324437	0.133563	0.00280553	0.0906912	0.0035689	0.073412	0.00217635
56.0626	C4H8	i-Butene	iWAS	0.351502	0.138627	0.30045	0.00534703	0.32217	0.0425858	0.640778	0.0466919			0.22541	0.00906408	0.241583	0.014097	0.404478	0.0100146	0.377394	0.00753307	0.433122	0.015181	0.325196	0.0116184	0.439892	0.0144867	0.389982	0.00998589	0.438696	0.0119934	0.360247	0.0101302	0.26442	0.0118839	0.108708	0.0042125
56.0626	C4H8	cis-2-Butene	iWAS	0.0414408	0.0182122	0.0380448	0.000882627	0.0407951	0.00542654	0.0687903	0.00500261			0.0259175	0.00119625	0.0226784	0.00150413	0.0421006	0.00151906	0.0392814	0.00129527	0.0597135	0.00223129	0.0448341	0.0017038	0.0527734	0.00217789	0.0529403	0.00181183	0.0595533	0.00211646	0.0489038	0.00176755	0.025286	0.00147764	0	0
70.0782	C5H10	2-Methyl-1-Butene	iWAS	0.0422158	0.0159614	0.0435895	0.000791691	0.0467407	0.0061807	0.0633147	0.00451804			0.0255111	0.000981028	0.0247671	0.00116379	0.0453739	0.00102467	0.0423356	0.000727619	0.075697	0.00220885	0.0568348	0.00170447	0.0463858	0.00152209	0.0395499	0.000741254	0.0444903	0.00093642	0.0365344	0.000805699	0.020964	0.000851424	0.0211476	0.000653378
70.0782	C5H10	trans-2-Pentene	iWAS	0.017898	0.00841329	0.0207579	0.000605694	0.0222585	0.0029869	0.0307123	0.00226814			0.0104262	0.000567353	0	0	0.0191317	0.000837759	0.0178506	0.000736624	0.0259822	0.00102163	0.019508	0.000778856	0.020423	0.000821967	0.0216057	0.000863622	0.0243046	0.000999001	0.0199584	0.000830811	0.00961873	0.000602063	0.0059321	0.000347644
70.0782	C5H10	1-Pentene	iWAS	0.0729442	0.0235536	0.0800602	0.00151045	0.0858479	0.0113605	0.103034	0.00735867			0.0450356	0.00158361	0.0455625	0.00197857	0.0806375	0.00207624	0.0752379	0.00159312	0.0877372	0.00274558	0.0658749	0.00211127	0.0880512	0.00273051	0.0878106	0.00159885	0.0987794	0.00203223	0.0811154	0.00175217	0.0416726	0.00172357	0.0277057	0.000835245
70.0782	C5H10	cis-2-Butene	iWAS	0.0125213	0.00492226	0.0144593	0.000395499	0.0155046	0.00207461	0.0204062	0.00150675			0.0070969	0.000374315	0.00594121	0.000437737	0.0131523	0.000537515	0.0122716	0.000468196	0.0186559	0.000705516	0.0140072	0.000538517	0.0138221	0.000575577	0.0135705	0.000508418	0.0152657	0.00059032	0.0125358	0.000491731	0.00641989	0.000380751	0.00471013	0.000248959
84.0939	C6H12	Methylcyclopentane	iWAS	0.00477576	0.00194467	0.0059646	0.000135138	0.0063958	0.000850165	0.00623705	0.000449377			0.00214168	9.61367e-05	0.00248998	7.62097e-05	0.00641332	0.000137955	0.00598387	9.42556e-05	0.00519775	0.000185648	0.00390258	0.000141982	0.00561477	0.000117211	0.00570658	8.87483e-05	0.00641942	0.000117248	0.00527148	0.000102344	0.00389745	0.000135943	0	0
98.1095	C7H14	Methylcyclohexane	iWAS	0.0039817	0.00225076	0.00570756	0.000122929	0.00612017	0.000812389	0	0			0.00177451	7.01568e-05	0.00201426	0.000136001	0.00637909	0.000169484	0.00595194	0.000131926	0.00429624	0.000169574	0.00322571	0.000129262	0.00493614	0.000103425	0.00469938	9.26657e-05	0.00528639	0.000115887	0.00434107	9.93619e-05	0.0049931	0.000192464	0	0
26.0157	C2H2	Ethyne	iWAS	0.304548	0.143151	0.311978	0.00516558	0.334531	0.0441658	0.536392	0.0399014			0.271731	0.00738651	0.314075	0.0105205	0.219849	0.00423246	0.205128	0.00256229	0.463447	0.0159031	0.347966	0.0121809	0.242943	0.00414004	0.192035	0.00268803	0.216022	0.00366392	0.177393	0.00322739	0.11542	0.00364975	0.619318	0.0142602
68.0626	C5H8	Pentadiene	iWAS	0.033296	0.0162162	0.0150276	0.000675501	0.016114	0.00223145	0.0675663	0.0079779			0.0315438	0.00156019	0.030731	0.0035882	0.0221049	0.000934569	0.0206247	0.000817973	0.044514	0.00187619	0.033422	0.00142755	0.0511156	0.00165205	0.0405623	0.00244324	0.0456291	0.00278296	0.0374696	0.00229858	0.0165264	0.00119854	0.0264888	0.00162684
68.0626	C5H8	Isoprene	iWAS	0.0702784	0.054479	0.092273	0.00238457	0.0989436	0.0132095	0	0			0.054147	0.00705683	0	0	0.0984165	0.00333077	0.0918263	0.00280152	0.138111	0.00515923	0.103697	0.0039396	0	0	0.123582	0.00567144	0.13902	0.00651735	0.11416	0.00540441	0	0	0	0
112.008	C6H5Cl	Chlorobenzene	WAS	0.00024155	0.000409176	0	0	0	0	0	0			4.76385e-05	3.20738e-05	0	0	0.000683241	4.5918e-05	0.00063749	4.18131e-05	0.0012879	5.08881e-05	0.000966978	3.87897e-05	0	0	0	0	0	0	0	0	0	0	0	0
77.0113	CH3NO3	Methyl nitrate	WAS	0.00243258	0.00158915	0.00376472	0.000112804	0.00403688	0.000542412	0	0			0.00207551	0.000102913	0.00318658	0.00013382	0.00307287	0.00014628	0.0028671	0.000129861	0	0	0	0	0.0030252	0.000135127	0.00240004	0.00014161	0.00269984	0.000161385	0.00221704	0.000133327	0.00152694	8.05978e-05	0.00561591	0.000204492
91.0269	C2H5NO3	Ethyl nitrate	WAS	0.000680467	0.000788255	0.00166898	6.13106e-05	0.00178963	0.000243451	0	0			0	0	0	0	0.00109802	7.71294e-05	0.00102449	7.03823e-05	0.00139023	0.00015618	0.00104381	0.000117486	0.00219184	9.55887e-05	0	0	0	0	0	0	0	0	0	0
105.043	C3H7NO3	i-Propyl nitrate	WAS	0.00179941	0.00100993	0.00192886	5.6014e-05	0.0020683	0.000277486	0	0			0.0020983	0.000254877	0.00225026	0.00019748	0.0023231	0.000129329	0.00216754	0.000116416	0.00128874	0.000211949	0.000967612	0.000159277	0.0039169	0.000138291	0.0020833	0.000140654	0.00234354	0.000159808	0.00192446	0.000131841	0.00163022	9.57544e-05	0	0
105.043	C3H7NO3	n-Propyl nitrate	WAS	0.000207801	0.00031605	0.000571473	2.60271e-05	0.000612786	8.49768e-05	0	0			0	0	0	0	0	0	0	0	0.000520188	8.20307e-05	0.000390568	6.16496e-05	0.001022	4.82528e-05	0	0	0	0	0	0	0	0	0	0
119.058	C4H9NO3	2-Butyl nitrate	WAS	0.000417448	0.000939041	0.00129424	5.43857e-05	0.0013878	0.0001909	0	0			0	0	0	0	0	0	0	0	0	0	0	0	0.00357968	0.000218362	0	0	0	0	0	0	0	0	0	0
60.0211	C2H4O2	Methyl formate	WAS	0.0199348	0.0207309	0	0	0	0	0	0			0.0239215	0.00132659	0.0533753	0.00497635	0	0	0	0	0	0	0	0	0.0346934	0.00120019	0.0466012	0.00167574	0.0524224	0.00195078	0.043048	0.00162681	0.0185721	0.000691704	0.0263876	0.000699032
60.0575	C3H8O	i-Propanol	WAS	0.00333559	0.00560523	0.0144025	0.000839852	0.0154437	0.00221424	0	0			0	0	0	0	0.0104435	0.000459636	0.00974415	0.000404405	0	0	0	0	0	0	0	0	0	0	0	0	0	0	0	0
117.914	CHCl3	Trichloromethane	WAS	8.37272e-05	0.000147476	0.000228944	1.87395e-05	0.000245495	3.79174e-05	0	0			0.000403634	8.73816e-05	0	0	0.000195461	9.48564e-06	0.000182373	8.43762e-06	0	0	0	0	0	0	0	0	0	0	0	0	0	0	0	0
84.0939	C6H12	1-Hexene	WAS	0.0490956	0.0121156	0.0677524	0.00166535	0.0726504	0.00968189	0.0452032	0.00436438	0.0561539	0.00275081			0.0314049	0.00219084	0.0489229	0.00147878	0.045647	0.0012069	0.0489784	0.00259291	0.036774	0.00196338			0.0519811	0.000794139	0.0610009	0.00299684	0.0500925	0.00248293	0.0294951	0.00141364	0.0412812	0.00325856
98.1095	C7H14	1-Heptene	WAS	0.0258107	0.00736598	0.0370072	0.00113219	0.0396825	0.00533754	0.0212977	0.00528083	0.0301873	0.00183403			0.0150046	0.00350303	0.027986	0.00189313	0.026112	0.00172445	0.0258846	0.00198296	0.0194347	0.00149492			0.0277018	0.000789111	0.0320044	0.00173616	0.0262813	0.00143616	0.0156413	0.000906969	0.017124	0.00162187
112.125	C8H16	1-Octene	WAS	0.0176862	0.00524952	0.0229948	0.000463628	0.0246571	0.00326764			0.019819	0.000936665			0.00957103	0.00200364	0.0189379	0.00129723	0.0176698	0.00118236	0.0167448	0.00113781	0.0125723	0.000858712			0.0205357	0.000875385	0.0245447	0.0014794	0.0201556	0.00122208	0.0113214	0.00068233	0.0103967	0.00123114
126.141	C9H18	1-Nonene	WAS	0.0146338	0.00518615	0.0221735	0.00140131	0.0237765	0.00345781			0.016103	0.000627667			0.0152538	0.004945	0.0170441	0.00144545	0.0159028	0.00132839	0.0125586	0.001891	0.00942923	0.0014213			0.0178083	0.000507286	0.0146186	0.00163561	0.0120044	0.00134545	0.00737378	0.000399031	0.00619218	0.000693057
40.0313	C3H4	Propyne	WAS	0.0572265	0.025329	0.0649443	0.00095234	0.0696393	0.00917837	0.0515194	0.00402314	0.0486137	0.00169651	0.0413362	0.00159891	0.0486934	0.00120725	0.0387646	0.000856387	0.0361689	0.000598111	0.115978	0.00426713	0.0870789	0.00326006	0.0493008	0.00110088	0.0336038	0.000549024	0.0451898	0.000786402	0.0371088	0.000690435	0.0341442	0.00113496	0.11354	0.00303386
54.047	C4H6	1-Butyne	WAS	0.00622899	0.00318942	0.00672958	0.000207713	0.00721607	0.000971054			0.00477661	0.000252751	0.00420669	0.00028892	0.00519014	0.00035485	0.00385426	0.000211731	0.00359617	0.000190399	0.0145285	0.000829421	0.0109083	0.000627307	0.00558731	7.19055e-05			0.00440768	0.000239106	0.00361948	0.000197789	0.00344663	0.00017569	0.00913857	0.000319462
54.047	C4H6	2-Butyne	WAS	0.00308619	0.00205186	0.00336479	3.15003e-05	0.00360804	0.000473788			0.00247676	7.2711e-05	0.000981561	0.000215489			0.0018257	2.87329e-05	0.00170345	9.79886e-06	0.00753327	0.00028669	0.00565613	0.000218784	0.00194341	0.000244211									0.00176875	0.000295754
52.0313	C4H4	1-Buten-3-yne	WAS	0.0141083	0.00693237	0.016387	0.000244629	0.0175717	0.00231645			0.0148173	0.000467149	0.0109345	0.000852194	0.0105483	0.00041169	0.00839749	0.000235806	0.00783518	0.000187705	0.0297863	0.00110756	0.0223642	0.000845866	0.0126288	0.000284795	0.00833834	0.00021224	0.0102732	0.000260971	0.00843615	0.000221382	0.00691268	0.000245599	0.0263932	0.00173951
50.0157	C4H2	1,3-Butadiyne	WAS	0.00119485	0.000590169	0.00109899	1.02885e-05	0.00117844	0.000154747			0.00081858	2.40313e-05					0.000563175	8.86325e-06	0.000525464	3.02266e-06	0.00199182	2.6182e-05	0.0014955	2.22172e-05	0.000899228	1.15726e-05									0.00218243	0.000274384
120.094	C9H12	i-Propylbenzene	WAS	0.00568533	0.00337379	0.00615725	5.76426e-05	0.00660237	0.000866988			0.00314482	9.23234e-05	0.00342738	0.000322457	0.00427135	0.000564346	0.00405676	6.38454e-05	0.00378512	2.17734e-05	0.01375	0.000180741	0.0103238	0.000153371	0.00485811	0.000543399									0.00216162	2.91176e-05
120.094	C9H12	n-Propylbenzene	WAS	0.0056446	0.00129363	0.00571744	5.35252e-05	0.00613077	0.00080506			0.00511034	0.000150026	0.00342738	0.000322457			0.00631052	9.9315e-05	0.00588796	3.38697e-05	0.00717392	9.42996e-05	0.00538633	8.00196e-05	0.00593769	7.64147e-05			0.00721662	0.000524126	0.00592613	0.000432164	0.00351015	0.000335339
120.094	C9H12	2-Ethyltoluene	WAS	0.00714566	0.00229147	0.00967567	0.000449034	0.0103752	0.00144172			0.00511034	0.000420758					0.00766277	0.000466605	0.00714966	0.000422575	0.00836958	0.000607866	0.00628405	0.000458466			0.00733173	0.000918838	0.00927851	0.0005297	0.0076193	0.00043786	0.00446746	0.000345018	0.00242364	0.000329142
120.094	C9H12	3-Ethyltoluene	WAS	0.0124258	0.00466956	0.0158329	0.000892008	0.0169775	0.00242071			0.00668275	0.00043934					0.0121703	0.000921625	0.0113553	0.000843669	0.0155435	0.000631777	0.0116704	0.000481181			0.0178711	0.00093047	0.0170106	0.00105491	0.0139687	0.000871132	0.00478656	0.000348689	0.0052403	0.000399311
120.094	C9H12	4-Ethyltoluene	WAS	0.00841899	0.00321756	0.0131941	0.000888237	0.0141479	0.00208354			0.00550344	0.00042501					0.00856428	0.000470472	0.0079908	0.000423073	0.00956523	0.000610906	0.00718177	0.000461366			0.0082482	0.000919467	0.0103095	0.000532982	0.00846589	0.000441207	0.00510567	0.000655582	0.00275116	0.000394766
120.094	C9H12	1,2,4-TMB	WAS	0.0125568	0.00425519	0.0162727	0.000892701	0.0174491	0.00247786			0.00825516	0.00082271					0.012621	0.00136676	0.0117759	0.00126352	0.0161413	0.000634362	0.0121192	0.000483623			0.0151217	0.000926514	0.0164951	0.00105349	0.0135454	0.000869687	0.00702029	0.000979258	0.00386472	0.000526609
120.094	C9H12	1,3,5-TMB	WAS	0.00322685	0.00103307	0.00422211	0.000266826	0.00452734	0.000658409			0.00196551	0.000397315					0.00265943	0.00045269	0.00248135	0.000420811	0.00490218	0.000779842	0.00368066	0.000586075			0.00229117	0.000458697	0.00304129	0.00051702	0.00249744	0.000424884
Total NMOGs emissions				26.8762	8.60761	24.186		29.7614		30.3021		18.1086		14.7981		17.3701		24.3559		24.4346		40.3412		45.1448		23.2734		32.6893		30.9448		31.9048		18.1255		17.8785
** Speciated C9 aromatics provided by UCI WAS (line 119-125)

## Sheet: S4 Correlations to MCE
Linear regression analysis for EFs vs. MCE
				FIREXAQ			WE-CAN
Exact Mass (da)	Chemical formula	NMOG contributor check Table S5, column G for isomers distribution	Detector	Slope	Standard deviation	R2	Slope	R2
27.0102	HCN	HCN	CIT-CIMS	-0.286344	1.91915	0.0130997	-13.8	0.47
30.0098	CH2O	Formaldehyde	CAMS & ISAF	-23.357	5.3704	0.557726
32.0255	CH4O	Methanol	NOAA PTR-ToF-MS	-12.3521	4.27448	0.357618	-15.23	0.69
41.0258	C2H3N	Acetonitrile	NOAA PTR-ToF-MS	-1.32987	1.53727	0.047521	-2.61	0.14
43.0051	HNCO	Isocyanic acid	NOAA PTR-ToF-MS	4.97165	2.49226	0.209669	0.17	0.01
44.0255	C2H4O	Acetaldehyde	NOAA PTR-ToF-MS	-19.7319	4.08232	0.608997	-16.81	0.7
46.0411	C2H6O	Ethanol	NOAA PTR-ToF-MS	-0.217415	0.180752	0.100148	-0.96	0.26
46.0048	HCOOH	Formic acid	NOAA PTR-ToF-MS	-6.56308	2.05591	0.404544
53.0258	C3H3N	Acrylonitrile	NOAA PTR-ToF-MS	0.0222655	0.122705	0.00219028	-0.35	0.23
56.0255	C3H4O	Acrolein	NOAA PTR-ToF-MS	-9.21295	2.38868	0.497923	-5.89	0.44
58.0411	C3H6O	Acetone + Propanal	NOAA PTR-ToF-MS for the sum	-8.97301	2.21337	0.522825	-8.12	0.62
60.0204	C2H4O2	Acetic acid + Glycolaldehyde	NOAA PTR-ToF-MS for the sum	-0.621633	0.247498	0.474019	-20.67	0.52
61.0157	CH3NO2	Nitromethane	NOAA PTR-ToF-MS	0.406901	0.1414	0.355695	0.06	0.02
62.0183	C2H6S	Dimethyl sulfide + Other unidentified organic compounds	NOAA PTR-ToF-MS	-0.0384322	0.0187963	0.217963
67.0415	C4H5N	Pyrrole	TOGA	0.00666248	0.0628277	0.000749121
67.0415	C4H5N	Butene nitrile isomers	TOGA	0.00399749	0.0376966	0.000749122
68.0255	C4H4O	Furan	TOGA	-5.92809	0.996302	0.702402
72.0568	C4H8O	MEK	NOAA PTR-ToF-MS	-2.45479	0.736197	0.425692
72.0568	C4H8O	Butanal	TOGA	-0.634496	0.192295	0.420566
72.0568	C4H8O	2-Methylpropanal	TOGA	-0.488074	0.147919	0.420566
74.0361	C3H6O2	Methyl acetate + Ethyl formate + Hydroxyacetone	NOAA PTR-ToF-MS for the sum	-11.7157	2.37596	0.618457	-7.74	0.65
78.0462	C6H6	Benzene	NOAA PTR-ToF-MS	-5.35986	1.11923	0.604571	-6.2	0.91
82.0411	C5H6O	2-Methylfuran	TOGA	-1.77723	0.29284	0.710605
82.0411	C5H6O	3-Methylfuran	TOGA	-0.299908	0.0494168	0.710605
84.0204	C4H4O2	2(3H)-Furanone	NOAA PTR-ToF-MS	-7.43284	1.83102	0.523487	-4.07	0.61
86.0361	C4H6O2	2,3-Butanedione + 2-Oxobutanal + 1,4-Butanedial	NOAA PTR-ToF-MS for the sum	-7.1984	1.41619	0.632678	-7.85	0.63
92.0619	C7H8	Toluene	NOAA PTR-ToF-MS	-7.28783	1.09807	0.745973	-6.73	0.82
94.0411	C6H6O	Phenol	CIT-CIMS	-1.0308	0.56	0.2	-4.08	0.46
96.0204	C5H4O2	2-Furfural	TOGA	-2.21159	0.40378	0.666665
96.0204	C5H4O2	3-Furfural	TOGA	-0.221159	0.040378	0.666665
96.0568	C6H8O	2,5-Dimethylfuran + 2-Ethylfuran + Other unidentified organic compounds	NOAA PTR-ToF-MS for the sum	-5.74307	1.13776	0.62944	-3.3	0.53
103.04	C7H5N	Benzonitrile	NOAA PTR-ToF-MS	-0.571056	0.259087	0.24464	-0.7	0.44
104.15	C8H8	Styrene	NOAA PTR-ToF-MS	-1.21793	0.291324	0.538147	-0.3	0.26
106.12	C7H6O	Benzaldehyde	NOAA PTR-ToF-MS	-1.44813	0.359294	0.519922	-1.07	0.78
106.167	C8H10	Ethylbenzene + p-/m-/o-Xylenes	NOAA PTR-ToF-MS for the sum	-2.22666	0.603513	0.475752	-3.09	0.67
108.14	C7H8O	2-Methylphenol (=o-cresol) + Anisol	NOAA PTR-ToF-MS for the sum	-7.55914	1.51963	0.622583	-3.99	0.58
118.1	C8H6O	Benzofuran	NOAA PTR-ToF-MS	-0.670092	0.202105	0.422922	-0.62	0.73
120.19	C9H12	C9 Aromatics	NOAA PTR-ToF-MS	-0.162281	0.0183646	0.886474	-1.04	0.51
124.09	C6H4O3	Hydroxy benzoquinone	NOAA PTR-ToF-MS	-2.1651	0.421479	0.637575	-0.8	0.42
124.14	C7H8O2	Guaiacol (=2-Methoxyphenol)	NOAA PTR-ToF-MS	-10.5546	2.42423	0.558247	-6.08	0.6
128.171	C10H8	Naphthalene	NOAA PTR-ToF-MS	-0.27218	0.262276	0.0669871
136.24	C10H16	Monoterpenes	NOAA PTR-ToF-MS	-9.75674	3.32704	0.364404	-3.58	0.26
138.16	C8H10O2	2-Methoxy-4-methylphenol (= Creosol)	NOAA PTR-ToF-MS	-9.19311	1.6893	0.66379	-3.65	0.53
154.17	C8H10O3	Syringol	NOAA PTR-ToF-MS	-0.434845	0.181747	0.276218	-0.23	0.52
110.11	C6H6O2	5-Methylfurfural + Benzene diols (=Catechol, Resorcinol)	NOAA PTR-ToF-MS for the sum	-15.9191	3.27621	0.6115	-4.5	0.65
70.0898	C4H6O	MVK + Methacrolein + 2-Butenal (=Crotonaldehyde)	NOAA PTR-ToF-MS for the sum	-8.47909	1.99115	0.54729	-5.06	0.51
58.04	CHOCHO	Glyoxal	ACES	-4.73487	1.47374	0.407635	0.05	0.05
72.06266	CH3COCHO	Methyl glyoxal	ACES	-10.6364	1.50914	0.79258	-2.82	0.53
47.013	HONO	Nitrous acid	NOAA CIMS	4.50819	2.22271	0.215225
108.01	N2O5	Dinitrogen pentoxide	NOAA CIMS	0.00535454	0.00146563	0.470851
30.01	NO	Nitric oxide	CL	3.63932	0.780716	0.591612
46.0055	NO2	Nitrogen dioxide	CL	21.3913	4.67626	0.58247
	NOy	NOy	CL
17.031	NH3	Ammonia	Oslo PTR-ToF-MS	-8.42181	9.62702	0.0650465
62.0049	pNO3-	Particulate nitrate	AMS	-12.0195	9.42954	0.103986
18.039	pNH4+	Particulate ammonium	AMS	-5.25693	4.4024	0.0924345
27.99	CO	Carbon monoxide	DACOM	-917.669	56.5775	0.946058
16.03	CH4	Methane	DACOM	-94.5832	8.4599	0.899278	-79.54	0.87
43.99	CO2	Carbon dioxide	DACOM	3538.35	341.787	0.877225
	BC	Black carbon (g/kg)	SP2	4.15783	1.74924	0.287526
	OA	Organic aerosol (g/kg)	AMS	-505.917	137.018	0.493365
	OA / OC	Organic aerosol to organic carbon ratio	AMS
	OC	Organic carbon (g/kg)	AMS
30.0469	C2H6	Ethane	iWAS	-10.8742	1.93359	0.69317	-20.61	0.25
44.0626	C3H8	Propane	iWAS	-3.78806	0.795397	0.635663	-4.89	0.29
58.0782	C4H10	i-Butane	iWAS	-0.205307	0.064155	0.440646	-0.36	0.14
58.0782	C4H10	n-Butane	iWAS	-0.604305	0.190511	0.436296	-1.44	0.22
72.0939	C5H12	i-Pentane	iWAS	-0.0278723	0.0567846	0.0196821	-0.24	0.16
72.0939	C5H12	n-Pentane	iWAS	-0.400849	0.132082	0.414687	-0.72	0.26
86.1095	C6H14	n-Hexane	iWAS	-0.26806	0.110869	0.310191	-0.98	0.31
86.1095	C6H14	2-Methylpentane	iWAS	-0.0300161	0.0213168	0.132335
100.125	C7H16	2,4-Dimethylpentane	iWAS	-0.369609	0.0494511	0.799611	-0.15	0.02
128.156	C9H20	n-Nonane	iWAS	-0.261068	0.100162	0.326717
142.172	C10H22	n-Decane	iWAS	-0.264547	0.100403	0.366502
28.0313	C2H4	Ethene	iWAS	-16.0258	2.24679	0.784204
42.047	C3H6	Propene	iWAS	-12.2071	1.48569	0.828241	-14.52	0.23
56.0626	C4H8	Trans-2-Butene	iWAS	-0.555792	0.0947918	0.741257
56.0626	C4H8	Butene	iWAS	-2.03241	0.300821	0.765283
56.0626	C4H8	i-Butene	iWAS	-4.45762	0.911297	0.630869
56.0626	C4H8	cis-2-Butene	iWAS	-0.543265	0.0888141	0.742146
70.0782	C5H10	2-Methyl-1-Butene	iWAS	-0.710219	0.0894359	0.818326
70.0782	C5H10	trans-2-Pentene	iWAS	-0.266032	0.0406973	0.766734
70.0782	C5H10	Pentene	iWAS	-0.796875	0.179083	0.585802
70.0782	C5H10	cis-2-Butene	iWAS	-0.191344	0.0280114	0.769213
84.0939	C6H12	Methylcyclopentane	iWAS	-0.179801	0.160507	0.0880302
98.1095	C7H14	Methylcyclohexane	iWAS	-0.0847475	0.0973197	0.0551172
26.0157	C2H2	Ethyne	iWAS	-3.30052	1.00823	0.433575
68.0626	C5H8	Pentadiene	iWAS	-0.46158	0.127525	0.483413
68.0626	C5H8	Isoprene	iWAS	-1.1318	0.284276	0.637843	-1.11	0.05
112.008	C6H5Cl	Chlorobenzene	WAS	-0.0155413	0.00416972	0.776434
77.0113	CH3NO3	Methyl nitrate	WAS	-0.00859387	0.0124933	0.0412421
91.0269	C2H5NO3	Ethyl nitrate	WAS	-0.00114525	0.00837635	0.00310594
105.043	C3H7NO3	i-Propyl nitrate	WAS	0.0134639	0.00570643	0.316897
105.043	C3H7NO3	n-Propyl nitrate	WAS	0.00151034	0.00467582	0.0254208
119.058	C4H9NO3	2-Butyl nitrate	WAS	0.160568	0.0954955	0.585678
60.0211	C2H4O2	Methyl formate	WAS	-0.621633	0.247498	0.474019
60.0575	C3H8O	i-Propanol	WAS	0.19028	0.633034	0.0292365	-0.15	0.27
117.914	CHCl3	Trichloromethane	WAS	0.00640792	0.00203391	0.712765
84.0939	C6H12	1-Hexene	WAS	-0.179801	0.160507	0.0880302
98.1095	C7H14	1-Heptene	WAS	-0.0847475	0.0973197	0.0551172
112.125	C8H16	1-Octene	WAS	-0.0979548	0.0729023	0.130774
126.141	C9H18	1-Nonene	WAS	-0.0338373	0.0720156	0.018065
40.0313	C3H4	Propyne	WAS	-0.716683	0.221322	0.411438
54.047	C4H6	1-Butyne	WAS	-0.135876	0.0276447	0.650142
54.047	C4H6	2-Butyne	WAS	-0.0919638	0.0104651	0.895619
52.0313	C4H4	1-Buten-3-yne	WAS	-0.232735	0.0644358	0.482359
50.0157	C4H2	1,3-Butadiyne	WAS	-0.0190136	0.00437454	0.702506
120.094	C9H12	i-Propylbenzene	WAS	-0.162281	0.0183646	0.886474
120.094	C9H12	n-Propylbenzene	WAS	-0.0452343	0.00715494	0.784182
120.094	C9H12	2-Ethyltoluene	WAS	-0.0686259	0.0272391	0.365895
120.094	C9H12	3-Ethyltoluene	WAS	-0.160088	0.053199	0.45152
120.094	C9H12	4-Ethyltoluene	WAS	-0.0752384	0.040521	0.238629
120.094	C9H12	1,2,4-TMB	WAS	-0.155615	0.0447449	0.523713
120.094	C9H12	1,3,5-TMB	WAS	-0.0397342	0.0135099	0.49009
					AVERAGE	0.460869		0.43087
					ST DEV	0.262133		0.241344

## Sheet: S5 Instrument intecomparisons
Comparison of NOAA PTR-ToF-MS measurements to other instruments during FIREX-AQ
Notes: For further measurement and instrument details we refer readers to https://www-air.larc.nasa.gov/missions/firex-aq/index.html						Colors indicate agreement with Firelab speciation (green=within a factor of 2, pink=more than a factor of 2)
Highlighted are the masses where the PTR-ToF-MS detects multiple isomers						Fractional contribution to the PTR ion signal to other instruments during FIREX-AQ
Exact Mass (da)	Chemical formula	NMOG contributor	Primary instrument for comparison	Instrument uncertainty (±%)	Fractional contribution to ion signal based on Koss et al. (2018) (total fraction of each m/z = 1)	TOGA / NOAA PTR all WF plumes	iWAS / NOAA PTR all WF plumes	WAS / NOAA PTR all WF plumes	NOAA CIMS / NOAA PTR all WF plumes	CIT CIMS / NOAA PTR all WF plumes	OSLO PTRMS / NOAA PTR only 1 WF / 1 day	OVERALL COMMENTS	Used method for this study
27.0102	HCN	HCN	NOAA PTR-ToF-MS	15	1	1.08			1.14	1.06		agreement within uncertainties between all	CIT-CIMS
32.0255	CH4O	Methanol	NOAA PTR-ToF-MS	15	1	2.87864					0.73632	TOGA is higher than both PTRs	NOAA PTR-ToF-MS
41.0258	C2H3N	Acetonitrile	NOAA PTR-ToF-MS	15	1	1.22305	1.13775				1.1115	agreement within uncertainties	NOAA PTR-ToF-MS
43.0051	HNCO	Isocyanic acid	NOAA PTR-ToF-MS	15	1				1.1			agreement within uncertainties	NOAA PTR-ToF-MS or NOAA CIMS
44.0255	C2H4O	Acetaldehyde	NOAA PTR-ToF-MS	15	1	0.917656						agreement within uncertainties	NOAA PTR-ToF-MS
46.0411	C2H6O	Ethanol	NOAA PTR-ToF-MS	15	1	0.67						ethanol is higher for the PTR but calibrated with limited interferences	NOAA PTR-ToF-MS
46.0048	HCOOH	Formic acid	NOAA PTR-ToF-MS	15	1				0.92			agreement within uncertainties	NOAA PTR-ToF-MS or NOAA CIMS
53.0258	C3H3N	Acrylonitrile	NOAA PTR-ToF-MS	15	1	1.28662	1.41005	1.22971				agreement within uncertainties	NOAA PTR-ToF-MS
56.0255	C3H4O	Acrolein	NOAA PTR-ToF-MS	15	1	1.01144		0.681415				agreement within uncertainties	NOAA PTR-ToF-MS
58.0411	C3H6O	Acetone	NOAA PTR-ToF-MS	15	1	0.912222	0.906255	0.519928			1.09833	agreement within uncertainties for the two PTR measurements and also agreement for the isomers distribution. PTR is less sensitive to propanal compared to acetone by 25% which explaing why TOGA isomers exceed the PTR signal.	NOAA PTR-ToF-MS for the sum
		Propanal	NOAA PTR-ToF-MS	15	0	0.269816
60.0204	C2H4O2	Acetic acid	NOAA PTR-ToF-MS	15	0.67							No other measurements to compare to for these compounds	NOAA PTR-ToF-MS for the sum
		Glycolaldehyde	NOAA PTR-ToF-MS	50	0.33
61.0157	CH3NO2	Nitromethane	NOAA PTR-ToF-MS	15	1	2.01896		1.11312				TOGA sees more than PTR and WAS	NOAA PTR-ToF-MS
62.0183	C2H6S	Dimethyl sulfide	NOAA PTR-ToF-MS	50	1	0.322338		0.560503				GCs see less than PTR. In wildfires the PTR could be influenced by fragmentation of other compounds in this mass given that DMS is also not expected to contribute substantially to wildfire emissions	NOAA PTR-ToF-MS for the sum
		Other unidentified organic compounds		100	0
67.0415	C4H5N	Pyrrole	NOAA PTR-ToF-MS	15	0.57	0.252071					1.27267	PTRs agree with each other but see much more than TOGA. This indicates possible influence of other isomers in this mass for the PTR as well as fragmentation of other compounds to this mass	TOGA, iWAS, WAS
		Butene nitrile isomers	NOAA PTR-ToF-MS	50	0.43	0.147395							TOGA, iWAS, WAS
68.0255	C4H4O	Furan	NOAA PTR-ToF-MS	15	1	0.46151	0.157075	0.19094			0.967153	PTRs agree with each other but see much more than TOGA. This indicates possible influence of other isomers in this mass for the PTR as well as fragmentation of other compounds to this mass	TOGA, iWAS, WAS or ( NOAA PTR-ToF-MS x 0.5 )
72.0568	C4H8O	MEK	NOAA PTR-ToF-MS	15	0.85	1.00605		0.473591				The sum of isomers from TOGA is above unity when compared to the PTR. However, Butanal and 2-methylpropanal fragment in the PTR and are not expected to contribute significantly to this mass. Therefore, GCs should be used to quantify Butanal and 2-methylpropanal	NOAA PTR-ToF-MS
		Butanal	NOAA PTR-ToF-MS	50	0.01	0.257136							TOGA, iWAS, WAS
		2-Methylpropanal	NOAA PTR-ToF-MS	50	0.14	0.20358		0.0568767					TOGA, iWAS, WAS
74.0361	C3H6O2	Methyl acetate	NOAA PTR-ToF-MS	15	0.35	0.147946		0.0622963			1.06038	Good agreement between the PTRs. Missing quantification of methylformate and hydroxyacetone from the GC techniques to conclude on the distribution of compounds in this mass	NOAA PTR-ToF-MS for the sum
		Ethyl formate	NOAA PTR-ToF-MS	15	0.14
		Hydroxyacetone	NOAA PTR-ToF-MS	15	0.5
78.0462	C6H6	Benzene	NOAA PTR-ToF-MS	50	1	0.961185	0.8542	0.538641				agreement within uncertainties	NOAA PTR-ToF-MS
82.0411	C5H6O	2-Methylfuran	NOAA PTR-ToF-MS	50	0.51	0.163918		0.125994				For the NOAA PTR a significant fraction (81%) of the signal is related to either fragments or other isomers that the GCs do not detect. This 81% contribution is also higher when compared to Firelab (37%)	TOGA, iWAS, WAS
		3-Methylfuran	NOAA PTR-ToF-MS	15	0.09	0.0270689		0.0137578					TOGA, iWAS, WAS
		Other unidentified organic compounds	NOAA PTR-ToF-MS	50	0.37	0.809013		0.860249
84.0204	C4H4O2	2(3H)Furanone	NOAA PTR-ToF-MS	15	0.81						1.17774	agreement within uncertainties	NOAA PTR-ToF-MS
86.0361	C4H6O2	2,3-Butanedione	NOAA PTR-ToF-MS	15	0.87							GC systems are not calibrated for these compounds. The Firelab contribution of 87% to 2,3 Butanedione might be an overestimation that should be taken into account when considering these values for model efforts.	NOAA PTR-ToF-MS
		2-Oxobutanal	NOAA PTR-ToF-MS	15	0.13
		1,4-Butanedial	NOAA PTR-ToF-MS	15
92.0619	C7H8	Toluene	NOAA PTR-ToF-MS	50	1	1.01073	0.742963	0.49543				agreement within uncertainties	NOAA PTR-ToF-MS
94.0411	C6H6O	Phenol	NOAA PTR-ToF-MS	15	1					0.42	1.21038	The 2 PTRs agree but there is a factor of 2 difference to CIT-CIMS possibly due to PTR-ToF-MS fragmentation of higher molecular weight gases that produce signals at the parent ion mass, or differences in the detection of other isomers from the two instruments. All instruments were calibrated for phenol	NOAA PTR-ToF-MS
96.0204	C5H4O2	2-Furfural	NOAA PTR-ToF-MS	50	0.84	0.222463						For the NOAA PTR a significant fraction (76%) of the signal is related to either fragments or other isomers that the GCs do not detect. This 76% contribution is also higher when compared to Firelab (11%)	TOGA, iWAS, WAS
		3-Furfural	NOAA PTR-ToF-MS	15	0.04	0.0199312							TOGA, iWAS, WAS
		Other unidentified organic compounds	NOAA PTR-ToF-MS	50	0.11	0.757606
96.0568	C6H8O	2,5-Dimethylfuran	NOAA PTR-ToF-MS	15	0.44						1.55062	The Oslo PTR sees more mass that the NOAA PTR but given the influence of different isomers in this mass and the calibration uncertainties these trends are more likely within the uncertainties	NOAA PTR-ToF-MS for the sum
		2-Ethylfuran	NOAA PTR-ToF-MS	15	0.1
		Other unidentified organic compounds	NOAA PTR-ToF-MS	50	0.46
104.15	C8H8	Styrene	NOAA PTR-ToF-MS	15	1	0.743474		0.354683				agreement within uncertainties with the TOGA measurements	NOAA PTR-ToF-MS
106.167	C8H10	Ethylbenzene	NOAA PTR-ToF-MS	4	0.1	0.0694686	0.320218	0.0498259				agreement within the uncertainties of the PTR with the sum of isomers from the GCs. The FIREX-AQ speciation is also in agreement with the Firelab results.	NOAA PTR-ToF-MS for sum
		m- and p-Xylenes	NOAA PTR-ToF-MS	15	0.68	0.582753	0.394502	0.309164
		o-Xylene	NOAA PTR-ToF-MS	15	0.23	0.205066	0.326021	0.172315
136.24	C10H16	Monoterpenes	NOAA PTR-ToF-MS	1	1	0.435748						high variability, potential missing monoterpenes from the GC systems (currently α-Pinene + β-Pinene+Myrcene + Camphene + Tricyclene) and PTR fragmentation	NOAA PTR-ToF-MS for sum
70.0898	C4H6O	MVK	NOAA PTR-ToF-MS	8	0.48	0.378377	0.13	0.229001				agreement within the uncertainties of the PTR with the sum of isomers from the GCs. The FIREX-AQ speciation is also in agreement with the Firelab results.	NOAA PTR-ToF-MS for sum
		Methacrolein	NOAA PTR-ToF-MS	3	0.19	0.272511	0.272211
		2-Butenal (=crotonaldehyde)	NOAA PTR-ToF-MS	5	0.33	0.325292

## Sheet: S6 FIREX-AQ vs. previous campai
Comparison of NOAA PTR-ToF-MS measurements during FIREX-AQ to other campaigns
Notes: For further measurement and instrument details we refer readers to https://www-air.larc.nasa.gov/missions/firex-aq/index.html					Emission factor Comparisons EF(this study) / EF(literature)
Exact Mass (da)	Chemical formula	NMOG contributor check S5 column G for isomers distribution in the same exact mass	Primary instrument for comparison	Instrument uncertainty (±%)	WE-CAN 2018	SEAC4RS 2013	Andreae (2019)	FireLab 2016	OVERALL average difference	Comments
27.0102	HCN	HCN	CIT-CIMS	15	0.164132	0.922999	0.490343	1.16229	0.684942
30.0098	CH2O	Formaldehyde	CAMS, ISAF	10	1.1172	0.932788	1.0119	1.26793	1.08245
32.0255	CH4O	Methanol	NOAA PTR-ToF-MS	15	0.943499	0.579578	0.657392	1.57774	0.939552
41.0258	C2H3N	Acetonitrile	NOAA PTR-ToF-MS	15	1.05428	1.29044	1.41496	4.60872	2.0921
43.0051	HNCO	Isocyanic acid	NOAA PTR-ToF-MS	15	3.334			1.00649	2.17024
44.0255	C2H4O	Acetaldehyde	NOAA PTR-ToF-MS	15	1.17867	1.19089	1.82018	2.35308	1.6357
46.0411	C2H6O	Ethanol	NOAA PTR-ToF-MS	15	0.573273		0.264007	0.401291	0.412857
46.0048	HCOOH	Formic acid	NOAA PTR-ToF-MS	15				2.51624	2.51624
53.0258	C3H3N	Acrylonitrile	NOAA PTR-ToF-MS	15	0.910351		1.29211	1.33518	1.17921
56.0255	C3H4O	Acrolein	NOAA PTR-ToF-MS	15	2.19552		2.61002	0.983107	1.92955
58.0411	C3H6O	Acetone + Propanal	NOAA PTR-ToF-MS for the sum	15	1.11296	0.827332	1.41221	2.6711	1.5059
60.0204	C2H4O2	Acetic acid + Glycolaldehyde	NOAA PTR-ToF-MS for the sum	15	0.857123		0.668721	1.09015	0.871999
61.0157	CH3NO2	Nitromethane	NOAA PTR-ToF-MS	15	0.66365			1.29412	0.978884
62.0183	C2H6S	Dimethyl sulfide	NOAA PTR-ToF-MS	50	0.045948	1.18576	0.26256		0.498088
67.0415	C4H5N	Pyrrole + Butene nitrile isomers + Other unidentified organic compounds	NOAA PTR-ToF-MS for the sum	15	1.19874			0.935015	1.06688
68.0255	C4H4O	Furan	TOGA	15			0.871412	0.953842	0.912627
72.0568	C4H8O	MEK + Butanal + 2-Methylpropanal	NOAA PTR-ToF-MS for the sum	15				2.64418	2.64418
74.0361	C3H6O2	Methyl acetate + Ethyl formate + Hydroxyacetone	NOAA PTR-ToF-MS	50	1.42624	0.713119		1.6788	1.27272
78.0462	C6H6	Benzene	NOAA PTR-ToF-MS	15	1.3915	1.60832	1.76874	2.03405	1.70065
82.0411	C5H6O	2-Methylfuran + 3-Methylfuran + Other unidentified organic compounds	NOAA PTR-ToF-MS for the sum	30	1.55987		1.91615	2.03112	1.83571
		2-Methylfuran + 3-Methylfuran	TOGA	15	0.2964		0.3648	0.3857	0.348967
84.0204	C4H4O2	2-(3H)-Furanone	NOAA PTR-ToF-MS	50	1.65771			1.34275	1.50023
86.0361	C4H6O2	2,3-Butanedione + 2-Oxobutanal + 1,4-Butanedial	NOAA PTR-ToF-MS for the sum	50	0.933418	0.234688	0.553136	1.17344	0.72367
92.0619	C7H8	Toluene	NOAA PTR-ToF-MS	15	1.27157	2.20405	2.0908	2.11589	1.92058
94.0411	C6H6O	Phenol	NOAA PTR-ToF-MS	15	1.11963		1.47506	0.774409	1.12303
96.0204	C5H4O2	2-Furfural + 3-Furfural + Other unidentified organic compounds	NOAA PTR-ToF-MS for the sum	15	1.35018		1.56663	1.4347	1.4505
		2-Furfural + 3-Furfural	TOGA	15	0.324		0.3768	0.3432	0.348
96.0568	C6H8O	2,5-Dimethylfuran + 2-Ethylfuran + Other C2-substituted furan isomers	NOAA PTR-ToF-MS	50	2.04554		5.04484	2.05577	3.04872
103.04	C7H5N	Benzonitrile	NOAA PTR-ToF-MS	50	1.46916			4.0402	2.75468
104.15	C8H8	Styrene	NOAA PTR-ToF-MS	15	5.95423		1.62388	1.53109	3.0364
106.12	C7H6O	Benzaldehyde	NOAA PTR-ToF-MS	50	1.73437		1.10369	1.61875	1.4856
106.167	C8H10	Ethylbenzene + m- and p-Xylenes + o-Xylene	NOAA PTR-ToF-MS	15	0.941449			1.61615	1.2788
108.14	C7H8O	2-Methylphenol (=o-Cresol) + Anisol	NOAA PTR-ToF-MS	15	2.48843			1.20715	1.84779
118.1	C8H6O	Benzofuran	NOAA PTR-ToF-MS	50	1.62932		0.713698	1.67005	1.33769
120.19	C9H12	C9 Aromatics	NOAA PTR-ToF-MS	15	1.21559			1.67751	1.44655
124.09	C6H4O3	Hydroxy benzoquinone	NOAA PTR-ToF-MS	50	2.60135			1.6723	2.13683
124.14	C7H8O2	Guaiacol (=2-Methoxyphenol)	NOAA PTR-ToF-MS	15	2.56704			1.26952	1.91828
128.171	C10H8	Naphthalene	NOAA PTR-ToF-MS	50				1.53963	1.53963
136.24	C10H16	Monoterpenes	NOAA PTR-ToF-MS	15	2.29198	1.15158	0.404236	1.57382	1.3554
138.16	C8H10O2	2-Methoxy-4-methylphenol (= Creosol)	NOAA PTR-ToF-MS	15	3.30406			1.30327	2.30366
154.17	C8H10O3	Syringol	NOAA PTR-ToF-MS	50	2.74646			1.16724	1.95685
110.11	C6H6O2	5-Methylfurfural + Benzene diols (=Catechol, Resorcinol)	NOAA PTR-ToF-MS	15	4.78928			1.42538	3.10733
70.0898	C4H6O	MVK + Methacrolein + 2-Butenal (=Crotonaldehyde)	NOAA PTR-ToF-MS	15	1.80691	2.15734	2.31896	2.09389	2.09427
58.04	CHOCHO	Glyoxal	ACES	4	43.2461		0.334722	1.5	15.0269
72.06266	CH3COCHO	Methyl glyoxal	ACES	4	2.01288		1.61776	1.75	1.79354
30.01	NO	Nitric oxide	CL	signal dependent error*		1.43989			1.43989
46.0055	NO2	Nitrogen dioxide	CL	signal dependent error*		1.87748			1.87748
17.031	NH3	Ammonia	Oslo PTR-ToF-MS	signal dependent error*			1.17608	1.77317	1.47462
62.0049	pNO3-	Particulate nitrate	AMS	34		1.36224			1.36224
18.039	pNH4+	Particulate ammonium	AMS	34		1.56445			1.56445
27.99	CO	Carbon monoxide	DACOM	2	1.09904	1.22225	0.964193		1.09516
16.03	CH4	Methane	DACOM	1	0.978946	1.18472	1.11637		1.09335
43.99	CO2	Carbon dioxide	DACOM	2	1.08553	1.0549	0.976955		1.03913
	BC	Black carbon	SP2	20-40	0.89884		0.635725		0.767282
	OA	Organic aerosol	AMS	38	1.43311	1.091	1.7646		1.42957	*assuming OA/OC=1.6 for other studies
84.93	CH2Cl2	Dichloromethane	NOAA iWAS	3	0.203515				0.203515
77.04	CH3NO3	Methyl nitrate	NOAA iWAS	signal dependent error*		1.62172			1.62172
91.07	C2H5NO3	Ethyl nitrate	NOAA iWAS	signal dependent error*		0.810079			0.810079
105.09	C3H7NO3	n-Propyl nitrate	NOAA iWAS	signal dependent error*		0.472276			0.472276
105.09	C3H7NO3	i-Propyl nitrate	NOAA iWAS	signal dependent error*		0.899704			0.899704
119.119	C4H9NO3	2-Butyl nitrate	NOAA iWAS	signal dependent error*		0.379498			0.379498
44.1	C3H8	Propane	NOAA iWAS	6	0.708509	1.35798			1.03324
58.12	C4H10	n-Butane	NOAA iWAS	signal dependent error*	0.653569	1.33928	1.00859		1.00048
58.12	C4H10	i-Butane	NOAA iWAS	signal dependent error*	0.712522	1.69224	0.873415		1.09273
72.15	C5H12	n-Pentane	NOAA iWAS	signal dependent error*	0.776777	1.47588	1.30224		1.18497
72.15	C5H12	i-Pentane	NOAA iWAS	signal dependent error*	0.634787	1.20609			0.920441
86.18	C6H14	n-Hexane	NOAA iWAS	signal dependent error*	0.816507	1.55525	1.02063		1.1308
86.18	C6H14	3-Methylpentane	NOAA iWAS	4
114.23	C8H18	2,2,4-Trimethylpentane	NOAA iWAS	signal dependent error*	0.0142688				0.0142688
42.08	C3H6	Propene	NOAA iWAS	6	1.0707	2.27907		1.50504	1.61827
68.12	C5H8	Isoprene	NOAA iWAS	signal dependent error*	0.857053	1.84943	0.739772		1.14875
60.1	C3H8O	Isopropanol	NOAA iWAS	18	2.27143				2.27143
28.05	C2H4	Ethene	NOAA iWAS	signal dependent error*	0.89				0.89
26.05	C2H2	Ethyne	NOAA iWAS	7	0.82				0.82
				AVERAGE TRENDS	1.41729	1.25689	1.24457	1.61343	1.39504
* Errors are calculated as a timeseries and provided at the FIREX-AQ data repository: https://www-air.larc.nasa.gov/missions/firex-aq/index.html				Standard deviation	1.06039	0.492302	0.849536	0.791125	0.677632

## Sheet: S7 Data Used
Species Measured	Technique	Institution	Data Used
O3, NO, NO2, NOy	Chemiluminescence	NOAA CSL	R1 & R2
CO2	2x Laser Absorption Spectroscopy	NOAA and NASA LaRC	R2 & R3
CO2, CO, CH4, H2O	2x Laser Absorption Spectroscopy	NOAA and NASA LaRC	R1
NH3, speciated hydrocarbons and OVOCs	PTR-ToF-MS	U Innsbruck, U Oslo	R1 & R2
PAN, PPN, other PANs	Chemical Ionization Mass Spectrometry (CIMS)	Georgia Tech	R0
HONO, HCN, HNCO, HCOOH, N2O5, HPMTF, halogenated compounds	Iodide ToF-CIMS	NOAA CSL	R0 & R1
NO	Laser Induced Fluorescence	NOAA CSL	R1
CH2O, C2H6	Laser Absorption Spectroscopy	CU Boulder	R0
C2-C10 Alkanes, C2-C4 Alkenes, C6-C9 Aromatics, C1-C5 Alkylnitrates, etc.	Whole Air Sampling	UC Irvine	R1
Speciated hydrocarbons and OVOCs	H3O+ ToF-CIMS	NOAA CSL	R3
C2-C10 Alkanes, C2-C4 Alkenes, C6-C9 Aromatics, C1-C5 Alkyl nitrates, etc.	Whole Air Sampling	NOAA CSL	R0
C3-C10 hydrocarbons, C1-C7 OVOCs, HCN, CH3CN, halogenated VOCs, etc.	HR-ToF-GC/MS	NCAR	R3
CH2O	Laser Induced Fluorescence	NASA GSFC	R3
H2O2, organic peroxides, organic acids, isoprene oxidation products, etc.	CIMS	Caltech	R1 phenol, R0 other
glyoxal, methylglyoxal, HONO, NO2	Airborne Cavity Enhanced Spectrometer	NOAA CSL	R1
BC mass concentration	SP2	NOAA CSL	R2 & R3
Submicron aerosol composition	CU-HR-AMS	CU Boulder	R2 & R3
MetNav Data	…	NASA NRSC	R1
j values	CAFS	NCAR	R0
